# Supplementary material for: Environmental, land cover and land use constraints on the distributional patterns of anurans: Leptodacylus species (Anura, Leptodactylidae) from Dry Chaco
Source: PeerJ. 2016 Nov 3;4:e2605. doi: 10.7717/peerj.2605 (PMC5101610; doi:10.7717/peerj.2605)
Supplement: Supplemental Information 1 — Locality data information includes collection number whenever available, museum acronym following Sabaj Perez (2010), locality data description, latitude and longitude in decimal degrees, and the bibliographical reference from which the information was obtained. [file peerj-04-2605-s001.xlsx]

## Sheet: Hoja1
Specie	Number	Museum acronyms	Country	Decimal latitude	Decimal longitude	Data	References
L. bufonius	111	FML	Argentina	-25.3763	-59.2045	1944-11-22
L. bufonius	00122	FML	Argentina	-24.9586	-60.9401	1944-12-13
L. bufonius	145	FML	Argentina	-23.2151	-63.5675	1944-11-11
L. bufonius	00245	FML	Argentina	-26.5749	-59.6311	1945-09-08
L. bufonius	00256	FML	Argentina	-26.5749	-59.6311	1945-01-08
L. bufonius	00268	FML	Argentina	-26.4968	-59.6765	1945-09-08
L. bufonius	00274	FML	Argentina	-23.3003	-63.6815	1945-12-02
L. bufonius	00278	FML	Argentina	-23.2151	-63.5675	1945-12-21
L. bufonius	00300	FML	Argentina	-28.4958	-59.6159	1946-01-30
L. bufonius	00303	FML	Argentina	-22.5226	-63.8091	1946-02-26
L. bufonius	00310	FML	Argentina	-23.3003	-63.6815	1944-11-18
L. bufonius	382	FML	Argentina	-23.2151	-63.5675	1947-01-28
L. bufonius	00378	FML	Argentina	-23.2151	-63.5675	1947-01-28
L. bufonius	00425	FML	Argentina	-23.2008	-63.584	1947-01-30
L. bufonius	00442	FML	Argentina	-23.3003	-63.6815	1947-02-06
L. bufonius	00455	FML	Argentina	-23.2151	-63.5675	1947-02-20
L. bufonius	00560	FML	Argentina	-22.2422	-63.737	1948-03-26
L. bufonius	00562	FML	Argentina	-23.2151	-63.5675	1951-10-14
L. bufonius	00587	FML	Argentina	-23.2151	-63.5675	1947-02-20
L. bufonius	00588	FML	Argentina	-26.7912	-60.4388	1948-10-10
L. bufonius	00632	FML	Argentina	-23.2151	-63.5675	1948-11-23
L. bufonius	00634	FML	Argentina	-27.3499	-65.2019	1949-03-28
L. bufonius	00648	FML	Argentina	-23.2151	-63.5675	1949-05-25
L. bufonius	00672	FML	Argentina	-23.9062	-61.8509	1949-07-09
L. bufonius	00705	FML	Argentina	-23.9062	-61.8509	1949-07-10
L. bufonius	00803	FML	Argentina	-26.9671	-64.399	1950-01-31
L. bufonius	00819	FML	Argentina	-27.3836	-64.2931	1950-02-18
L. bufonius	00824	FML	Argentina	-26.9671	-64.399	1950-11-09
L. bufonius	00841	FML	Argentina	-23.2151	-63.5675	1950-03-21
L. bufonius	00844	FML	Argentina	-23.2151	-63.5675	1950-03-21
L. bufonius	00879	FML	Argentina	-23.9062	-61.8509	1950-08-27
L. bufonius	00883	FML	Argentina	-24.0276	-61.9189	1950-09-01
L. bufonius	00949	FML	Argentina	-26.2484	-58.2106	1950-11-10
L. bufonius	00968	FML	Argentina	-24.0276	-61.9189	1950-09-01
L. bufonius	00980	FML	Argentina	-23.9062	-61.8509	1951-03-26
L. bufonius	00981	FML	Argentina	-23.2151	-63.5675	1951-03-19
L. bufonius	01045	FML	Argentina	-23.55	-61.2667	1951-10-04
L. bufonius	1050	FML	Argentina	-24.4369	-61.4537	18-23/10/1951
L. bufonius	01057	FML	Argentina	-23.6333	-61.3666	1951-11-01
L. bufonius	01059	FML	Argentina	-23.6333	-61.3666	1951-11-01
L. bufonius	01080	FML	Argentina	-23.9062	-61.8509	1951-11-27
L. bufonius	01096	FML	Argentina	-23.9062	-61.8509	1951-11-30
L. bufonius	01139	FML	Argentina	-29.5036	-63.6951	1952-12-15
L. bufonius	01266	FML	Argentina	-24.2262	-64.6946	1966-01-24
L. bufonius	01400	FML	Argentina	-22.9397	-64.4295	1967-12-06
L. bufonius	01441	FML	Argentina	-28.3136	-65.362	1958-12-05
L. bufonius	01517	FML	Argentina	-23.432	-64.3527	1966-01-23
L. bufonius	01746	FML	Argentina	-23.2151	-63.5675	1961-03-01
L. bufonius	01752	FML	Argentina	-23.2151	-63.5675	1960-03-01
L. bufonius	01755	FML	Argentina	-23.8986	-63.1929	1971-08-15
L. bufonius	01761	FML	Argentina	-26.2338	-64.6399	1968-12-14
L. bufonius	01779	FML	Argentina	-23.2151	-63.5675	1959-04-14
L. bufonius	01790	FML	Argentina	-23.4791	-64.9496	1958-11-01
L. bufonius	01795	FML	Argentina	-23.2151	-63.5675	1959-04-14
L. bufonius	01971	FML	Argentina	-23.2151	-63.5675	1959-04-01
L. bufonius	02006	FML	Argentina	-22.1512	-63.7128	1948-04-03
L. bufonius	02190	FML	Argentina	-27.3841	-63.5349	1973-04-06
L. bufonius	02226	FML	Argentina	-28.561	-64.1347	1973-11-22
L. bufonius	02227	FML	Argentina	-28.4838	-64.1513	1973-11-24
L. bufonius	02228	FML	Argentina	-28.7268	-64.0932	1973-11-21
L. bufonius	02268	FML	Argentina	-27.3644	-63.4945	1973-04-06
L. bufonius	02438	FML	Argentina	-31.4624	-67.3514	1975-01-24
L. bufonius	02449	FML	Argentina	-24.2294	-64.8364	1975-01-12
L. bufonius	02520	FML	Argentina	-27.3841	-63.5349	1976-03-23
L. bufonius	02633	FML	Argentina	-24.2294	-64.8364	1977-12-23
L. bufonius	2831	FML	Argentina	-25.9586	-62.4758	30-31/03/1980
L. bufonius	02884	FML	Argentina	-28.2917	-64.1851
L. bufonius	02961	FML	Argentina	-25.2782	-59.7533	1981-11-17
L. bufonius	02999	FML	Argentina	-27.465	-58.99	1981-11-16
L. bufonius	03234	FML	Argentina	-23.2151	-63.5675	1981-11-20
L. bufonius	03262	FML	Argentina	-28.3693	-64.7971	1982-12-17
L. bufonius	03540	FML	Argentina	-28.3693	-64.7971	1985-01-03
L. bufonius	03543	FML	Argentina	-28.3693	-64.7971	1985-01-03
L. bufonius	03544	FML	Argentina	-28.3693	-64.7971	1985-01-03
L. bufonius	03545	FML	Argentina	-28.3693	-64.7971	1985-01-02
L. bufonius	03546	FML	Argentina	-28.3693	-64.7971	1985-01-03
L. bufonius	03568	FML	Argentina	-26.1698	-62.8318	1985-10-27
L. bufonius	03569	FML	Argentina	-24.2708	-61.2173	1985-11-11
L. bufonius	03570	FML	Argentina	-26.5078	-61.1833	1985-10-30
L. bufonius	03571	FML	Argentina	-24.9846	-58.8221	1985-11-08
L. bufonius	03572	FML	Argentina	-23.2151	-63.5675	1985-11-13
L. bufonius	3573	FML	Argentina	-25.8195	-62.8239	1985-10-28
L. bufonius	3574	FML	Argentina	-26.5843	-62.8458	1985-10-27
L. bufonius	03733	FML	Argentina	-28.3693	-64.7971	1985-01-03
L. bufonius	03897	FML	Argentina	-27.3841	-63.5349	1982-12-01
L. bufonius	03931	FML	Argentina	-27.3841	-63.5349	1982-12-01
L. bufonius	04210	FML	Argentina	-24.7053	-60.5939	1987-12-08
L. bufonius	04355	FML	Argentina	-25.8195	-62.8239	1987-11-20
L. bufonius	04366	FML	Argentina	-27.3841	-63.5349	1988-11-30
L. bufonius	04410	FML	Argentina	-25.8195	-62.8239	1987-11-20
L. bufonius	04642	FML	Argentina	-23.21	-64.0964	1989-12-21
L. bufonius	04648	FML	Argentina	-23.208	-64.0935	1989-12-19
L. bufonius	04745	FML	Argentina	-27.3841	-63.5349	1990-03-10
L. bufonius	04795	FML	Argentina	-24.9299	-63.6516	1989-12-05
L. bufonius	04796	FML	Argentina	-24.9299	-63.6516	1989-12-13
L. bufonius	04797	FML	Argentina	-24.9299	-63.6516	1989-12-13
L. bufonius	04798	FML	Argentina	-23.208	-64.0935	1989-12-20
L. bufonius	04799	FML	Argentina	-23.2472	-64.139	1989-12-21
L. bufonius	04800	FML	Argentina	-24.9299	-63.6516	1989-12-27
L. bufonius	04852	FML	Argentina	-24.9326	-63.6609	1991-12-27
L. bufonius	04858	FML	Argentina	-23.2151	-63.5675	1950-03-21
L. bufonius	04908	FML	Argentina	-29.7999	-64.7041	1991-12-07
L. bufonius	04927	FML	Argentina	-24.7175	-63.3093	1992-02-01
L. bufonius	05240	FML	Argentina	-24.62	-64.07	1993-02-08
L. bufonius	05258	FML	Argentina	-24.7175	-63.3093	1993-01-10
L. bufonius	05267	FML	Argentina	-24.7175	-63.3093	1993-01-15
L. bufonius	05279	FML	Argentina	-24.7175	-63.3093	1993-01-17
L. bufonius	05302	FML	Argentina	-24.7175	-63.3093	1993-01-14
L. bufonius	05309	FML	Argentina	-24.7175	-63.3093	1993-01-11
L. bufonius	05327	FML	Argentina	-24.7175	-63.3093	1993-01-10
L. bufonius	05328	FML	Argentina	-24.7175	-63.3093	1993-01-23
L. bufonius	05331	FML	Argentina	-24.7175	-63.3093	1993-01-29
L. bufonius	05335	FML	Argentina	-24.7175	-63.3093	1993-01-24
L. bufonius	05347	FML	Argentina	-24.7175	-63.3093	1993-01-30
L. bufonius	05358	FML	Argentina	-24.7175	-63.3093	1993-01-29
L. bufonius	05362	FML	Argentina	-25.1578	-64.0905	1987-12-21
L. bufonius	05364	FML	Argentina	-25.1578	-64.0905	1989-01-21
L. bufonius	05366	FML	Argentina	-25.1578	-64.0905	1989-03-19
L. bufonius	05367	FML	Argentina	-25.1578	-64.0905	1988-03-14
L. bufonius	05368	FML	Argentina	-25.1578	-64.0905	1988-05-05
L. bufonius	05369	FML	Argentina	-25.1578	-64.0905	1989-01-02
L. bufonius	05370	FML	Argentina	-25.1578	-64.0905	1989-01-25
L. bufonius	05371	FML	Argentina	-25.1578	-64.0905	1989-04-02
L. bufonius	05372	FML	Argentina	-25.1578	-64.0905	1988-04-03
L. bufonius	05443	FML	Argentina	-24.7175	-63.3093	1994-02-26
L. bufonius	05447	FML	Argentina	-24.7175	-63.3093	1994-02-27
L. bufonius	05449	FML	Argentina	-24.7175	-63.3093	1994-03-02
L. bufonius	05458	FML	Argentina	-24.7175	-63.3093	1994-03-05
L. bufonius	05492	FML	Argentina	-27.3827	-63.4882	1994-01-04
L. bufonius	05575	FML	Argentina	-25.1578	-64.0905	1988-01-13
L. bufonius	05576	FML	Argentina	-25.1578	-64.0905	1988-03-17
L. bufonius	05577	FML	Argentina	-25.1578	-64.0905	1987-12-04
L. bufonius	05578	FML	Argentina	-25.1578	-64.0905	1987-12-30
L. bufonius	05579	FML	Argentina	-25.1578	-64.0905	1988-01-01
L. bufonius	05580	FML	Argentina	-25.1578	-64.0905	1988-01-03
L. bufonius	05581	FML	Argentina	-25.1578	-64.0905	1988-01-08
L. bufonius	05582	FML	Argentina	-25.1578	-64.0905	1987-12-30
L. bufonius	05584	FML	Argentina	-25.0985	-64.2065	1988-01-16
L. bufonius	05585	FML	Argentina	-25.1578	-64.0905	1987-12-30
L. bufonius	05586	FML	Argentina	-25.1578	-64.0905	1987-12-30
L. bufonius	05587	FML	Argentina	-25.1578	-64.0905	1988-01-05
L. bufonius	05588	FML	Argentina	-25.1578	-64.0905	1988-01-08
L. bufonius	05594	FML	Argentina	-25.1578	-64.0905	1988-01-05
L. bufonius	05597	FML	Argentina	-25.1578	-64.0905	1988-12-22
L. bufonius	05598	FML	Argentina	-25.1578	-64.0905	1988-12-22
L. bufonius	05599	FML	Argentina	-25.1578	-64.0905	1987-12-30
L. bufonius	05600	FML	Argentina	-25.1578	-64.0905	1988-01-18
L. bufonius	05627	FML	Argentina	-25.1578	-64.0905	1988-12-14
L. bufonius	05628	FML	Argentina	-25.1578	-64.0905	1989-02-24
L. bufonius	05634	FML	Argentina	-25.1578	-64.0905	1989-03-09
L. bufonius	05636	FML	Argentina	-25.1578	-64.0905	1989-03-11
L. bufonius	05638	FML	Argentina	-25.1578	-64.0905	1988-01-18
L. bufonius	05639	FML	Argentina	-25.1578	-64.0905	1988-02-13
L. bufonius	05642	FML	Argentina	-25.1578	-64.0905	1989-02-27
L. bufonius	05643	FML	Argentina	-25.1578	-64.0905	1989-02-28
L. bufonius	05652	FML	Argentina	-25.1578	-64.0905	1988-01-14
L. bufonius	05659	FML	Argentina	-25.0985	-64.2065	1989-03-08
L. bufonius	05673	FML	Argentina	-25.1578	-64.0905	1988-01-09
L. bufonius	05689	FML	Argentina	-25.1578	-64.0905	1988-12-07
L. bufonius	05691	FML	Argentina	-25.1578	-64.0905	1988-12-09
L. bufonius	05693	FML	Argentina	-25.1578	-64.0905	1988-12-15
L. bufonius	05706	FML	Argentina	-25.1578	-64.0905	1989-01-05
L. bufonius	05733	FML	Argentina	-25.1578	-64.0905	1988-11-17
L. bufonius	05735	FML	Argentina	-25.1578	-64.0905	1989-02-07
L. bufonius	05736	FML	Argentina	-25.1578	-64.0905	1989-02-08
L. bufonius	05739	FML	Argentina	-25.1578	-64.0905	1989-02-24
L. bufonius	05810	FML	Argentina	-24.7175	-63.3093	1995-12-03
L. bufonius	05880	FML	Argentina	-24.7175	-63.3093	1995-03-03
L. bufonius	05881	FML	Argentina	-24.7175	-63.3093	1995-09-23
L. bufonius	05993	FML	Argentina	-25.8195	-62.8239	1995-12-29
L. bufonius	06488	FML	Argentina	-25.1578	-64.0905	1988-11-18
L. bufonius	06805	FML	Argentina	-26.7912	-60.4388	1995-12-27
L. bufonius	06806	FML	Argentina	-26.7912	-60.4388	1995-12-27
L. bufonius	06807	FML	Argentina	-26.7912	-60.4388	1995-12-27
L. bufonius	06808	FML	Argentina	-26.7912	-60.4388	1995-12-27
L. bufonius	06809	FML	Argentina	-26.7912	-60.4388	1995-12-27
L. bufonius	06810	FML	Argentina	-26.7912	-60.4388	1995-12-27
L. bufonius	06811	FML	Argentina	-26.7912	-60.4388	1995-12-27
L. bufonius	06812	FML	Argentina	-26.7912	-60.4388	1995-12-27
L. bufonius	06813	FML	Argentina	-26.7912	-60.4388	1995-12-27
L. bufonius	06814	FML	Argentina	-26.7912	-60.4388	1995-12-27
L. bufonius	06965	FML	Argentina	-22.3805	-62.5161	1998-02-28
L. bufonius	07676	FML	Argentina	-22.3805	-62.5161	1998-10-06
L. bufonius	07677	FML	Argentina	-22.3805	-62.5161	1998-10-06
L. bufonius	07678	FML	Argentina	-22.3805	-62.5161	1998-10-06
L. bufonius	07679	FML	Argentina	-22.3805	-62.5161	1998-10-06
L. bufonius	07680	FML	Argentina	-22.3805	-62.5161	1998-10-06
L. bufonius	08010	FML	Argentina	-23.1667	-64.0667	1999-02-19
L. bufonius	08011	FML	Argentina	-23.1667	-64.0667	1999-02-19
L. bufonius	08045	FML	Argentina	-23.9062	-61.8509	1999-02-21
L. bufonius	8824	FML	Argentina	-22.3805	-62.5161	1999-10-20
L. bufonius	09063	FML	Argentina	-24.7175	-63.3093	2000-01-13
L. bufonius	09085	FML	Argentina	-24.7175	-63.3093	2000-01-13
L. bufonius	09086	FML	Argentina	-24.7175	-63.3093	2000-01-13
L. bufonius	09115	FML	Argentina	-24.7175	-63.3093	2000-01-13
L. bufonius	09116	FML	Argentina	-24.7175	-63.3093	2000-01-13
L. bufonius	09127	FML	Argentina	-24.7175	-63.3093	2000-01-13
L. bufonius	09168	FML	Argentina	-24.7175	-63.3093	1999-12-27
L. bufonius	09177	FML	Argentina	-24.7175	-63.3093	1999-12-28
L. bufonius	09178	FML	Argentina	-24.7175	-63.3093	1999-12-28
L. bufonius	09179	FML	Argentina	-24.7175	-63.3093	1999-12-28
L. bufonius	09180	FML	Argentina	-24.7175	-63.3093	1999-12-28
L. bufonius	09181	FML	Argentina	-24.7175	-63.3093	1999-12-28
L. bufonius	09182	FML	Argentina	-24.7175	-63.3093	1999-12-28
L. bufonius	09183	FML	Argentina	-24.7175	-63.3093	1999-12-28
L. bufonius	09184	FML	Argentina	-24.7175	-63.3093	1999-12-28
L. bufonius	09185	FML	Argentina	-24.7175	-63.3093	1999-12-28
L. bufonius	09186	FML	Argentina	-24.7175	-63.3093	1999-12-28
L. bufonius	09187	FML	Argentina	-24.7175	-63.3093	1999-12-28
L. bufonius	09188	FML	Argentina	-24.7175	-63.3093	1999-12-28
L. bufonius	09703	FML	Argentina	-24.7175	-63.3093	1999-12-27
L. bufonius	09704	FML	Argentina	-24.7175	-63.3093	1999-12-27
L. bufonius	09705	FML	Argentina	-24.7175	-63.3093	1999-12-27
L. bufonius	09779	FML	Argentina	-22.3805	-62.5161	1998-10-06
L. bufonius	09780	FML	Argentina	-22.3805	-62.5161	1998-10-06
L. bufonius	09781	FML	Argentina	-22.3805	-62.5161	1998-10-06
L. bufonius	09782	FML	Argentina	-22.3805	-62.5161	1998-10-06
L. bufonius	09783	FML	Argentina	-22.3805	-62.5161	1998-10-06
L. bufonius	09784	FML	Argentina	-24.7175	-63.3093	1999-12-29
L. bufonius	09785	FML	Argentina	-24.7175	-63.3093	1999-12-29
L. bufonius	09786	FML	Argentina	-24.7175	-63.3093	1999-12-29
L. bufonius	09787	FML	Argentina	-24.7175	-63.3093	1999-12-29
L. bufonius	09788	FML	Argentina	-24.7175	-63.3093	1999-12-29
L. bufonius	09789	FML	Argentina	-24.7175	-63.3093	1999-12-29
L. bufonius	09790	FML	Argentina	-24.7175	-63.3093	1999-12-29
L. bufonius	09791	FML	Argentina	-24.7175	-63.3093	1999-12-29
L. bufonius	09792	FML	Argentina	-24.7175	-63.3093	1999-12-29
L. bufonius	09793	FML	Argentina	-24.7175	-63.3093	1999-12-29
L. bufonius	10013	FML	Argentina	-26.1667	-58.9333	2001-03-18
L. bufonius	10014	FML	Argentina	-26.1667	-58.9333	2001-03-18
L. bufonius	10015	FML	Argentina	-26.1667	-58.9333	2001-03-18
L. bufonius	10033	FML	Argentina	-26.1667	-58.9333	2001-03-18
L. bufonius	10034	FML	Argentina	-26.1667	-58.9333	2001-03-18
L. bufonius	10656	FML	Argentina	-26.1667	-58.9333	2001-11-02
L. bufonius	10684	FML	Argentina	-26.1667	-58.9333	2001-11-02
L. bufonius	10686	FML	Argentina	-26.1667	-58.9333	2001-11-02
L. bufonius	10687	FML	Argentina	-26.1667	-58.9333	2001-11-02
L. bufonius	10698	FML	Argentina	-26.1667	-58.9333	2001-11-01
L. bufonius	11050	FML	Argentina	-26.1667	-58.9333	1992-10-01
L. bufonius	11051	FML	Argentina	-26.1667	-58.9333	1993-11-13
L. bufonius	11052	FML	Argentina	-26.1667	-58.9333	1993-12-11
L. bufonius	12126	FML	Argentina	-23.9062	-61.8509	1999-02-21
L. bufonius	12128	FML	Argentina	-23.208	-64.0935	1999-02-19
L. bufonius	12129	FML	Argentina	-23.208	-64.0935	1999-02-19
L. bufonius	12130	FML	Argentina	-23.208	-64.0935	1999-02-19
L. bufonius	12131	FML	Argentina	-23.208	-64.0935	1999-02-19
L. bufonius	12132	FML	Argentina	-23.208	-64.0935	1999-02-19
L. bufonius	12133	FML	Argentina	-23.208	-64.0935	1999-02-19
L. bufonius	12134	FML	Argentina	-23.208	-64.0935	1999-02-19
L. bufonius	12135	FML	Argentina	-23.208	-64.0935	1999-02-19
L. bufonius	12136	FML	Argentina	-23.208	-64.0935	1999-02-19
L. bufonius	12137	FML	Argentina	-23.208	-64.0935	1999-02-19
L. bufonius	12138	FML	Argentina	-23.208	-64.0935	1999-02-19
L. bufonius	12139	FML	Argentina	-23.208	-64.0935	1999-02-19
L. bufonius	12140	FML	Argentina	-23.208	-64.0935	1999-02-19
L. bufonius	12141	FML	Argentina	-23.208	-64.0935	1999-02-19
L. bufonius	12142	FML	Argentina	-23.208	-64.0935	1999-02-19
L. bufonius	12143	FML	Argentina	-23.208	-64.0935	1999-02-19
L. bufonius	12144	FML	Argentina	-23.208	-64.0935	1999-02-19
L. bufonius	12155	FML	Argentina	-24.7175	-63.3093	2000-01-13
L. bufonius	13122	FML	Argentina	-26.3057	-58.8312	2001-11-15
L. bufonius	13123	FML	Argentina	-26.3057	-58.8312	2001-11-15
L. bufonius	13139	FML	Argentina	-26.3057	-58.8312	2001-11-12
L. bufonius	13140	FML	Argentina	-26.3057	-58.8312	2001-11-12
L. bufonius	13141	FML	Argentina	-26.3057	-58.8312	2001-11-12
L. bufonius	13142	FML	Argentina	-26.3057	-58.8312	2001-11-12
L. bufonius	13143	FML	Argentina	-26.3057	-58.8312	2001-11-12
L. bufonius	13144	FML	Argentina	-26.3057	-58.8312	2001-11-15
L. bufonius	13145	FML	Argentina	-26.3057	-58.8312	2001-11-15
L. bufonius	14084	FML	Argentina	-26.3057	-58.8312
L. bufonius	14286	FML	Argentina	-26.3057	-58.8312	2001-11-29
L. bufonius	14289	FML	Argentina	-26.3057	-58.8312	2001-11-29
L. bufonius	14301	FML	Argentina	-26.3057	-58.8312	2001-11-15
L. bufonius	14302	FML	Argentina	-26.3057	-58.8312	2001-11-15
L. bufonius	14309	FML	Argentina	-26.3057	-58.8312	2001-12-17
L. bufonius	14310	FML	Argentina	-26.3057	-58.8312	2001-12-17
L. bufonius	14330	FML	Argentina	-26.3057	-58.8312	2001-12-17
L. bufonius	14331	FML	Argentina	-26.3057	-58.8312	2001-12-17
L. bufonius	14344	FML	Argentina	-26.3057	-58.8312	2001-11-15
L. bufonius	14346	FML	Argentina	-26.3057	-58.8312	2001-11-15
L. bufonius	14351	FML	Argentina	-26.3057	-58.8312	2001-11-29
L. bufonius	14352	FML	Argentina	-26.3057	-58.8312	2001-11-29
L. bufonius	14353	FML	Argentina	-26.3057	-58.8312	2001-11-17
L. bufonius	14359	FML	Argentina	-26.3057	-58.8312	2001-11-17
L. bufonius	14377	FML	Argentina	-26.3057	-58.8312	2001-11-15
L. bufonius	14381	FML	Argentina	-26.3057	-58.8312	2001-11-29
L. bufonius	14382	FML	Argentina	-26.3057	-58.8312	2001-11-29
L. bufonius	14389	FML	Argentina	-26.3057	-58.8312	2001-11-15
L. bufonius	14398	FML	Argentina	-26.3057	-58.8312	2001-12-17
L. bufonius	14399	FML	Argentina	-26.3057	-58.8312	2001-12-17
L. bufonius	14408	FML	Argentina	-26.3057	-58.8312	2001-11-15
L. bufonius	14409	FML	Argentina	-26.3057	-58.8312	2001-11-15
L. bufonius	14421	FML	Argentina	-26.3057	-58.8312	2001-11-17
L. bufonius	14433	FML	Argentina	-26.3057	-58.8312	2001-11-17
L. bufonius	14457	FML	Argentina	-26.3057	-58.8312	2001-11-29
L. bufonius	14458	FML	Argentina	-26.3057	-58.8312	2001-11-29
L. bufonius	14459	FML	Argentina	-26.3057	-58.8312	2001-11-29
L. bufonius	14481	FML	Argentina	-26.3057	-58.8312	2001-11-15
L. bufonius	14496	FML	Argentina	-26.3057	-58.8312	2002-01-20
L. bufonius	14497	FML	Argentina	-26.3057	-58.8312	2002-01-20
L. bufonius	14499	FML	Argentina	-26.3057	-58.8312	2002-01-20
L. bufonius	14540	FML	Argentina	-26.3057	-58.8312	2001-11-15
L. bufonius	14550	FML	Argentina	-26.3057	-58.8312	2001-11-15
L. bufonius	14551	FML	Argentina	-26.3057	-58.8312	2001-11-15
L. bufonius	14559	FML	Argentina	-26.3057	-58.8312	2001-11-15
L. bufonius	14560	FML	Argentina	-26.3057	-58.8312	2001-11-15
L. bufonius	14566	FML	Argentina	-26.3057	-58.8312	2001-11-15
L. bufonius	14567	FML	Argentina	-26.3057	-58.8312	2001-11-15
L. bufonius	14584	FML	Argentina	-26.3057	-58.8312	2001-11-15
L. bufonius	14592	FML	Argentina	-26.3057	-58.8312	2001-11-29
L. bufonius	14598	FML	Argentina	-26.3057	-58.8312	2001-11-15
L. bufonius	14607	FML	Argentina	-26.3057	-58.8312	2001-11-17
L. bufonius	14614	FML	Argentina	-26.3057	-58.8312	2001-11-15
L. bufonius	14615	FML	Argentina	-26.3057	-58.8312	2001-11-15
L. bufonius	14631	FML	Argentina	-26.3057	-58.8312	2001-11-15
L. bufonius	14646	FML	Argentina	-26.3057	-58.8312	2001-11-15
L. bufonius	14647	FML	Argentina	-26.3057	-58.8312	2001-11-15
L. bufonius	14648	FML	Argentina	-26.3057	-58.8312	2001-11-15
L. bufonius	14653	FML	Argentina	-26.3057	-58.8312	2001-11-15
L. bufonius	14655	FML	Argentina	-26.3057	-58.8312	2001-11-15
L. bufonius	14679	FML	Argentina	-26.3057	-58.8312	00/11-12/2001
L. bufonius	14702	FML	Argentina	-26.3057	-58.8312	00/11-12/2001
L. bufonius	14714	FML	Argentina	-26.3057	-58.8312	00/11-12/2001
L. bufonius	14721	FML	Argentina	-26.3057	-58.8312	00/11-12/2001
L. bufonius	14742	FML	Argentina	-26.3057	-58.8312	2002-01-20
L. bufonius	15576	FML	Argentina	-26.3057	-58.8312	2002-10-10
L. bufonius	15652	FML	Argentina	-26.3057	-58.8312	2002-10-25
L. bufonius	15659	FML	Argentina	-26.3057	-58.8312	2002-10-25
L. bufonius	15670	FML	Argentina	-26.3057	-58.8312	2002-12-15
L. bufonius	15673	FML	Argentina	-26.3057	-58.8312	2002-12-15
L. bufonius	15677	FML	Argentina	-26.3057	-58.8312	2002-12-15
L. bufonius	15790	FML	Argentina	-23.8492	-63.3505	2001-11-07
L. bufonius	15791	FML	Argentina	-23.8492	-63.3505	2001-11-07
L. bufonius	16080	FML	Argentina	-25.1195	-64.1285	2005-02-07
L. bufonius	17518	FML	Argentina	-23.9393	-63.1469	2001-11-04
L. bufonius	17519	FML	Argentina	-23.9393	-63.1469	2001-11-04
L. bufonius	17520	FML	Argentina	-23.9393	-63.1469	2001-11-04
L. bufonius	17521	FML	Argentina	-23.9393	-63.1469	2001-11-04
L. bufonius	17522	FML	Argentina	-23.9393	-63.1469	2001-11-04
L. bufonius	17524	FML	Argentina	-23.9393	-63.1469	2001-11-04
L. bufonius	17525	FML	Argentina	-23.9393	-63.1469	2001-11-04
L. bufonius	17526	FML	Argentina	-23.9393	-63.1469	2001-11-04
L. bufonius	17527	FML	Argentina	-23.9393	-63.1469	2001-11-04
L. bufonius	17528	FML	Argentina	-23.9393	-63.1469	2001-11-04
L. bufonius	17529	FML	Argentina	-23.9393	-63.1469	2001-11-04
L. bufonius	17530	FML	Argentina	-23.9393	-63.1469	2001-11-04
L. bufonius	17531	FML	Argentina	-23.9393	-63.1469	2001-11-04
L. bufonius	17532	FML	Argentina	-23.9393	-63.1469	2001-11-04
L. bufonius	20271	FML	Argentina	-30.5652	-63.5159	1974-12-17
L. bufonius	20272	FML	Argentina	-30.5652	-63.5159	1975-01-30
L. bufonius	20273	FML	Argentina	-31.4186	-65.4576	1991-12-10
L. bufonius	20274	FML	Argentina	-31.4186	-65.4576	1991-12-10
L. bufonius	20275	FML	Argentina	-31.4186	-65.4576	1991-12-10
L. bufonius	20276	FML	Argentina	-31.4186	-65.4576	1991-12-10
L. bufonius	20277	FML	Argentina	-31.4186	-65.4576	1991-12-10
L. bufonius	20278	FML	Argentina	-31.4186	-65.4576	1991-12-10
L. bufonius	20279	FML	Argentina	-31.4186	-65.4576	1994-12-14
L. bufonius	20280	FML	Argentina	-31.4186	-65.4576	1994-12-14
L. bufonius	20281	FML	Argentina	-31.4186	-65.4576	1994-12-14
L. bufonius	20282	FML	Argentina	-31.4186	-65.4576	1994-12-14
L. bufonius	20283	FML	Argentina	-31.4186	-65.4576	1994-12-14
L. bufonius	20284	FML	Argentina	-31.4186	-65.4576	1994-12-14
L. bufonius	20285	FML	Argentina	-31.4186	-65.4576	1994-12-14
L. bufonius	20286	FML	Argentina	-31.4186	-65.4576	1994-12-14
L. bufonius	20287	FML	Argentina	-31.4186	-65.4576	1994-12-14
L. bufonius	20288	FML	Argentina	-28.9492	-61.871	1995-01-08
L. bufonius	20289	FML	Argentina	-28.9492	-61.871	1995-01-08
L. bufonius	20781	FML	Argentina	-30.5652	-63.5159	1974-12-17
L. bufonius	20782	FML	Argentina	-31.4186	-65.4576	1991-12-10
L. bufonius	20783	FML	Argentina	-31.4186	-65.4576	1991-12-10
L. bufonius	20784	FML	Argentina	-32.0465	-65.0397	1993-12-02
L. bufonius	20785	FML	Argentina	-31.4186	-65.4576	1994-04-01
L. bufonius	20786	FML	Argentina	-31.4186	-65.4576	1994-12-14
L. bufonius	20787	FML	Argentina	-28.9492	-61.871	1995-01-08
L. bufonius	20788	FML	Argentina	-28.9492	-61.871	1995-01-08
L. bufonius	20789	FML	Argentina	-30.5652	-63.5159	1995-01-01
L. bufonius	23187	FML	Argentina	-28.4633	-64.1456	2009-02-22
L. bufonius	23188	FML	Argentina	-28.4633	-64.1456	2009-02-22
L. bufonius	23189	FML	Argentina	-28.4633	-64.1456	2009-02-22
L. bufonius	23853	FML	Argentina	-23.7604	-63.1268	2001-11-03
L. bufonius	23854	FML	Argentina	-23.7604	-63.1268	2001-11-03
L. bufonius	23984	FML	Argentina	-26.3057	-58.8312	2010-12-06
L. bufonius	23985	FML	Argentina	-26.3057	-58.8312	2010-12-06
L. bufonius	23986	FML	Argentina	-26.3057	-58.8312	2010-12-06
L. bufonius	23987	FML	Argentina	-26.3057	-58.8312	2010-12-06
L. bufonius	24078	FML	Argentina	-26.3057	-58.8312	2011-01-23
L. bufonius	24085	FML	Argentina	-26.3057	-58.8312	2011-01-23
L. bufonius	24086	FML	Argentina	-26.3057	-58.8312	2011-01-23
L. bufonius	24470	FML	Argentina	-29.6206	-64.8361	2011-12-15
L. bufonius	24471	FML	Argentina	-29.6206	-64.8361	2011-12-15
L. bufonius	24608	FML	Argentina	-24.5115	-65.0844	2012-02-23
L. bufonius	14441	FML	Argentina	-26.3057	-58.8312	2001-12-17
L. bufonius	15588	FML	Argentina	-26.3057	-58.8312	2002-11-15
L. bufonius	15666	FML	Argentina	-26.3057	-58.8312
L. bufonius	404	MACN	Argentina	-28.6817	-57.8581
L. bufonius	3015	MACN	Argentina	-23.208	-64.0935
L. bufonius	6885	MACN	Argentina	-29.8575	-67.5117
L. bufonius	6886	MACN	Argentina	-29.8575	-67.5117
L. bufonius	6887	MACN	Argentina	-29.8575	-67.5117
L. bufonius	6888	MACN	Argentina	-29.8575	-67.5117
L. bufonius	8072	MACN	Paraguay	-22.3411	-58.2116	12/09/1944
L. bufonius	8073	MACN	Paraguay	-22.3411	-58.2116	12/09/1944
L. bufonius	8074	MACN	Paraguay	-22.3411	-58.2116	12/09/1944
L. bufonius	8075	MACN	Paraguay	-22.3411	-58.2116	12/09/1944
L. bufonius	8076	MACN	Paraguay	-22.3411	-58.2116	12/09/1944
L. bufonius	8077	MACN	Paraguay	-22.3411	-58.2116	12/09/1944
L. bufonius	8078	MACN	Paraguay	-22.3411	-58.2116	12/09/1944
L. bufonius	8079	MACN	Paraguay	-22.3411	-58.2116	12/09/1944
L. bufonius	8080	MACN	Paraguay	-22.3411	-58.2116	12/09/1944
L. bufonius	8081	MACN	Paraguay	-22.3411	-58.2116	12/09/1944
L. bufonius	8082	MACN	Paraguay	-22.3411	-58.2116	12/09/1944
L. bufonius	8083	MACN	Paraguay	-22.3411	-58.2116	12/09/1944
L. bufonius	8084	MACN	Paraguay	-22.3411	-58.2116	12/09/1944
L. bufonius	8085	MACN	Paraguay	-22.3411	-58.2116	12/09/1944
L. bufonius	8086	MACN	Paraguay	-22.3411	-58.2116	12/09/1944
L. bufonius	8087	MACN	Paraguay	-22.3411	-58.2116	12/09/1944
L. bufonius	8088	MACN	Paraguay	-22.3411	-58.2116	12/09/1944
L. bufonius	8089	MACN	Paraguay	-22.3411	-58.2116	12/09/1944
L. bufonius	8090	MACN	Paraguay	-22.3411	-58.2116	12/09/1944
L. bufonius	8213	MACN	Paraguay	-22.2117	-57.9403	12/09/1944
L. bufonius	8214	MACN	Paraguay	-22.2117	-57.9403	12/09/1944
L. bufonius	8215	MACN	Paraguay	-22.2117	-57.9403	12/09/1944
L. bufonius	8216	MACN	Paraguay	-22.2117	-57.9403	12/09/1944
L. bufonius	8217	MACN	Paraguay	-22.2117	-57.9403	12/09/1944
L. bufonius	8218	MACN	Paraguay	-22.2117	-57.9403	12/09/1944
L. bufonius	8324	MACN	Argentina	-29.2317	-61.7714
L. bufonius	8325	MACN	Argentina	-29.2317	-61.7714
L. bufonius	8713	MACN	Argentina	-27.3256	-61.2826
L. bufonius	8714	MACN	Argentina	-27.3256	-61.2826
L. bufonius	8715	MACN	Argentina	-27.3256	-61.2826
L. bufonius	8716	MACN	Argentina	-27.3256	-61.2826
L. bufonius	8717	MACN	Argentina	-27.3256	-61.2826
L. bufonius	8718	MACN	Argentina	-27.3256	-61.2826
L. bufonius	8719	MACN	Argentina	-27.3256	-61.2826
L. bufonius	8720	MACN	Argentina	-27.3256	-61.2826
L. bufonius	8721	MACN	Argentina	-27.3256	-61.2826
L. bufonius	8722	MACN	Argentina	-27.3256	-61.2826
L. bufonius	8723	MACN	Argentina	-27.3256	-61.2826
L. bufonius	8724	MACN	Argentina	-27.3256	-61.2826
L. bufonius	8725	MACN	Argentina	-27.3256	-61.2826
L. bufonius	8726	MACN	Argentina	-27.3256	-61.2826
L. bufonius	8727	MACN	Argentina	-27.3256	-61.2826
L. bufonius	8728	MACN	Argentina	-27.3256	-61.2826
L. bufonius	8729	MACN	Argentina	-27.3256	-61.2826
L. bufonius	8730	MACN	Argentina	-27.3256	-61.2826
L. bufonius	12872	MACN	Argentina	-24.6246	-61.4173	/09/1959
L. bufonius	12873	MACN	Argentina	-24.6246	-61.4173	/09/1959
L. bufonius	13057	MACN	Argentina	-27.9224	-58.1015	01/02/1960
L. bufonius	15019	MACN	Argentina	-27.0207	-58.5772	29/10/1962
L. bufonius	15769	MACN	Argentina	-23.8958	-61.8507	/04/1960
L. bufonius	15770	MACN	Argentina	-23.8958	-61.8507	/04/1960
L. bufonius	15827	MACN	Argentina	-23.8958	-61.8507	/04/1960
L. bufonius	15828	MACN	Argentina	-23.8958	-61.8507	/04/1960
L. bufonius	15829	MACN	Argentina	-23.8958	-61.8507	/04/1960
L. bufonius	15830	MACN	Argentina	-23.8958	-61.8507	/04/1960
L. bufonius	15831	MACN	Argentina	-23.8958	-61.8507	/04/1960
L. bufonius	15832	MACN	Argentina	-23.8958	-61.8507	/04/1960
L. bufonius	15833	MACN	Argentina	-23.8958	-61.8507	/04/1960
L. bufonius	15834	MACN	Argentina	-23.8958	-61.8507	/04/1960
L. bufonius	15835	MACN	Argentina	-23.8958	-61.8507	/04/1960
L. bufonius	15836	MACN	Argentina	-23.8958	-61.8507	/04/1960
L. bufonius	15848	MACN	Argentina	-22.2747	-62.7155	/06/1960
L. bufonius	15849	MACN	Argentina	-22.2747	-62.7155	/06/1960
L. bufonius	17360	MACN	Argentina	-31.4957	-60.7305	/07/1958
L. bufonius	21402	MACN	Argentina	-27.887	-59.2811	/12/1939
L. bufonius	21511	MACN	Argentina	-30.1206	-66.9744	02/10/1965
L. bufonius	22456	MACN	Argentina	-29.147	-59.2623	14/09/1965
L. bufonius	23558	MACN	Argentina	-30.5262	-58.3743	24/05/1966
L. bufonius	24345	MACN	Argentina	-31.1842	-60.8765
L. bufonius	24346	MACN	Argentina	-31.1842	-60.8765
L. bufonius	24347	MACN	Argentina	-31.1842	-60.8765
L. bufonius	24348	MACN	Argentina	-31.1842	-60.8765
L. bufonius	24349	MACN	Argentina	-31.1842	-60.8765
L. bufonius	24350	MACN	Argentina	-31.1842	-60.8765
L. bufonius	24351	MACN	Argentina	-31.1842	-60.8765
L. bufonius	24352	MACN	Argentina	-31.1842	-60.8765
L. bufonius	24353	MACN	Argentina	-31.1842	-60.8765
L. bufonius	24354	MACN	Argentina	-31.1842	-60.8765
L. bufonius	24355	MACN	Argentina	-31.1842	-60.8765
L. bufonius	24356	MACN	Argentina	-31.1842	-60.8765
L. bufonius	26211	MACN	Argentina	-28.5359	-62.7241	14/10/1967
L. bufonius	26212	MACN	Argentina	-28.5359	-62.7241	14/10/1967
L. bufonius	26213	MACN	Argentina	-28.5359	-62.7241	14/10/1967
L. bufonius	26214	MACN	Argentina	-28.5359	-62.7241	14/10/1967
L. bufonius	26215	MACN	Argentina	-28.5359	-62.7241	14/10/1967
L. bufonius	26216	MACN	Argentina	-28.5359	-62.7241	14/10/1967
L. bufonius	26217	MACN	Argentina	-28.5359	-62.7241	14/10/1967
L. bufonius	26218	MACN	Argentina	-28.5359	-62.7241	14/10/1967
L. bufonius	26219	MACN	Argentina	-28.5359	-62.7241	14/10/1967
L. bufonius	26220	MACN	Argentina	-28.5359	-62.7241	14/10/1967
L. bufonius	26221	MACN	Argentina	-28.5359	-62.7241	14/10/1967
L. bufonius	26222	MACN	Argentina	-28.9857	-63.4462	13/10/1967
L. bufonius	26223	MACN	Argentina	-28.9857	-63.4462	13/10/1967
L. bufonius	26224	MACN	Argentina	-28.9857	-63.4462	13/10/1967
L. bufonius	26225	MACN	Argentina	-28.9857	-63.4462	13/10/1967
L. bufonius	26226	MACN	Argentina	-29.145	-62.6557	17/10/1967
L. bufonius	26227	MACN	Argentina	-28.8865	-62.2649	15/10/1967
L. bufonius	26228	MACN	Argentina	-29.4286	-63.4754	12/10/1967
L. bufonius	26256	MACN	Argentina	-28.105	-63.1986	23/10/1967
L. bufonius	26257	MACN	Argentina	-28.105	-63.1986	23/10/1967
L. bufonius	26258	MACN	Argentina	-28.105	-63.1986	23/10/1967
L. bufonius	26259	MACN	Argentina	-28.105	-63.1986	23/10/1967
L. bufonius	26260	MACN	Argentina	-28.105	-63.1986	23/10/1967
L. bufonius	26261	MACN	Argentina	-28.105	-63.1986	23/10/1967
L. bufonius	26262	MACN	Argentina	-28.105	-63.1986	23/10/1967
L. bufonius	26263	MACN	Argentina	-28.105	-63.1986	23/10/1967
L. bufonius	26264	MACN	Argentina	-28.105	-63.1986	23/10/1967
L. bufonius	26265	MACN	Argentina	-28.105	-63.1986	23/10/1967
L. bufonius	26266	MACN	Argentina	-28.105	-63.1986	23/10/1967
L. bufonius	26267	MACN	Argentina	-28.105	-63.1986	23/10/1967
L. bufonius	26268	MACN	Argentina	-28.105	-63.1986	23/10/1967
L. bufonius	26269	MACN	Argentina	-28.105	-63.1986	23/10/1967
L. bufonius	26270	MACN	Argentina	-27.9646	-62.6081	25/10/1967
L. bufonius	26271	MACN	Argentina	-27.9646	-62.6081	25/10/1967
L. bufonius	26272	MACN	Argentina	-27.9646	-62.6081	25/10/1967
L. bufonius	26273	MACN	Argentina	-27.9646	-62.6081	25/10/1967
L. bufonius	26274	MACN	Argentina	-27.9646	-62.6081	25/10/1967
L. bufonius	26275	MACN	Argentina	-27.9646	-62.6081	25/10/1967
L. bufonius	26276	MACN	Argentina	-27.9646	-62.6081	25/10/1967
L. bufonius	26277	MACN	Argentina	-27.9646	-62.6081	25/10/1967
L. bufonius	26278	MACN	Argentina	-27.9646	-62.6081	25/10/1967
L. bufonius	26279	MACN	Argentina	-27.9646	-62.6081	25/10/1967
L. bufonius	26280	MACN	Argentina	-27.9646	-62.6081	25/10/1967
L. bufonius	26281	MACN	Argentina	-27.9646	-62.6081	25/10/1967
L. bufonius	26282	MACN	Argentina	-28.4661	-62.1079	26/10/1967
L. bufonius	26283	MACN	Argentina	-28.4661	-62.1079	26/10/1967
L. bufonius	26284	MACN	Argentina	-28.4661	-62.1079	26/10/1967
L. bufonius	26285	MACN	Argentina	-28.4661	-62.1079	26/10/1967
L. bufonius	26286	MACN	Argentina	-28.4661	-62.1079	26/10/1967
L. bufonius	26287	MACN	Argentina	-28.4661	-62.1079	26/10/1967
L. bufonius	26288	MACN	Argentina	-28.4661	-62.1079	26/10/1967
L. bufonius	26289	MACN	Argentina	-28.4661	-62.1079	26/10/1967
L. bufonius	26290	MACN	Argentina	-28.4661	-62.1079	26/10/1967
L. bufonius	26291	MACN	Argentina	-28.4661	-62.1079	26/10/1967
L. bufonius	26292	MACN	Argentina	-28.4661	-62.1079	26/10/1967
L. bufonius	26293	MACN	Argentina	-28.4661	-62.1079	26/10/1967
L. bufonius	26294	MACN	Argentina	-28.4661	-62.1079	26/10/1967
L. bufonius	26295	MACN	Argentina	-28.4661	-62.1079	26/10/1967
L. bufonius	26296	MACN	Argentina	-28.0222	-61.1878	28/10/1967
L. bufonius	26297	MACN	Argentina	-28.0222	-61.1878	28/10/1967
L. bufonius	26679	MACN	Argentina	-26.2376	-61.8237	18/05/1968
L. bufonius	26680	MACN	Argentina	-25.8066	-62.8298	17/05/1968
L. bufonius	26681	MACN	Argentina	-27.327	-62.2252	13/05/1968
L. bufonius	26683	MACN	Argentina	-26.6732	-61.8132	20/05/1968
L. bufonius	26684	MACN	Argentina	-26.6732	-61.8132	20/05/1968
L. bufonius	26685	MACN	Argentina	-26.6732	-61.8132	20/05/1968
L. bufonius	26686	MACN	Argentina	-26.6732	-61.8132	20/05/1968
L. bufonius	26687	MACN	Argentina	-26.6732	-61.8132	20/05/1968
L. bufonius	26688	MACN	Argentina	-26.6732	-61.8132	20/05/1968
L. bufonius	26689	MACN	Argentina	-26.6732	-61.8132	20/05/1968
L. bufonius	26690	MACN	Argentina	-26.6732	-61.8132	20/05/1968
L. bufonius	26691	MACN	Argentina	-26.6732	-61.8132	20/05/1968
L. bufonius	26692	MACN	Argentina	-26.6732	-61.8132	20/05/1968
L. bufonius	26693	MACN	Argentina	-26.6732	-61.8132	20/05/1968
L. bufonius	26694	MACN	Argentina	-27.6501	-62.4062	12/05/1968
L. bufonius	26695	MACN	Argentina	-27.6501	-62.4062	12/05/1968
L. bufonius	26696	MACN	Argentina	-27.6501	-62.4062	12/05/1968
L. bufonius	26697	MACN	Argentina	-27.6501	-62.4062	12/05/1968
L. bufonius	26698	MACN	Argentina	-27.6501	-62.4062	12/05/1968
L. bufonius	26699	MACN	Argentina	-27.6501	-62.4062	12/05/1968
L. bufonius	26700	MACN	Argentina	-27.6501	-62.4062	12/05/1968
L. bufonius	26701	MACN	Argentina	-27.6501	-62.4062	12/05/1968
L. bufonius	26702	MACN	Argentina	-27.6501	-62.4062	12/05/1968
L. bufonius	26703	MACN	Argentina	-27.6501	-62.4062	12/05/1968
L. bufonius	26704	MACN	Argentina	-27.6501	-62.4062	12/05/1968
L. bufonius	26705	MACN	Argentina	-27.6501	-62.4062	12/05/1968
L. bufonius	26706	MACN	Argentina	-27.6501	-62.4062	12/05/1968
L. bufonius	26707	MACN	Argentina	-27.6501	-62.4062	12/05/1968
L. bufonius	27033	MACN	Argentina	-27.8344	-63.4632	06/05/1968
L. bufonius	27040	MACN	Argentina	-28.1953	-65.1101	03/05/1968
L. bufonius	29794	MACN	Argentina	-27.465	-58.99	10/12/1971
L. bufonius	29795	MACN	Argentina	-27.465	-58.99	10/12/1971
L. bufonius	31955	MACN	Paraguay	-22.1392	-59.9464	10/10/1977
L. bufonius	32342	MACN	Argentina	-31.9715	-65.0876	01/01/1982
L. bufonius	33335	MACN	Argentina	-28.5115	-59.044	20/11/1961
L. bufonius	33338	MACN	Argentina	-28.5115	-59.044	26/11/1961
L. bufonius	33339	MACN	Argentina	-28.5115	-59.044	26/11/1961
L. bufonius	33340	MACN	Argentina	-28.5115	-59.044	26/11/1961
L. bufonius	33341	MACN	Argentina	-28.5115	-59.044	26/11/1961
L. bufonius	33359	MACN	Argentina	-25.2927	-57.728	07/11/1968
L. bufonius	33447	MACN	Argentina	-31.4192	-65.4769	/05/1987
L. bufonius	33448	MACN	Argentina	-31.4192	-65.4769	/05/1987
L. bufonius	33449	MACN	Argentina	-31.4192	-65.4769	/05/1987
L. bufonius	33795	MACN	Argentina	-28.5115	-59.044
L. bufonius	33796	MACN	Argentina	-28.5115	-59.044
L. bufonius	33797	MACN	Argentina	-28.5115	-59.044
L. bufonius	33798	MACN	Argentina	-28.5115	-59.044
L. bufonius	33918	MACN	Argentina	-23.6116	-62.5948	24/11/1990
L. bufonius	34116	MACN	Argentina	-24.7053	-60.5939	/11/1987
L. bufonius	34228	MACN	Argentina	-32.5552	-67.041	18/01/1986
L. bufonius	34229	MACN	Argentina	-32.5552	-67.041	18/01/1986
L. bufonius	34230	MACN	Argentina	-32.5552	-67.041	18/01/1986
L. bufonius	34236	MACN	Argentina	-31.4192	-65.4769	/01/1987
L. bufonius	34237	MACN	Argentina	-31.4192	-65.4769	/01/1987
L. bufonius	34678	MACN	Argentina	-25.1258	-58.1334	14/03/1993
L. bufonius	35360	MACN	Argentina	-30.7665	-67.457	27/01/1994
L. bufonius	35500	MACN	Argentina	-26.014	-64.6734	23/01/1981
L. bufonius	35501	MACN	Argentina	-26.014	-64.6734	23/01/1981
L. bufonius	38157	MACN	Argentina	-23.9739	-61.7011	10/01/2000
L. bufonius	38158	MACN	Argentina	-22.6934	-62.2049	13/01/2000
L. bufonius	38159	MACN	Argentina	-22.6934	-62.2049	13/01/2000
L. bufonius	38160	MACN	Argentina	-22.6934	-62.2049	14/01/2000
L. bufonius	38161	MACN	Argentina	-22.6934	-62.2049	14/01/2000
L. bufonius	38162	MACN	Argentina	-22.6934	-62.2049	14/01/2000
L. bufonius	38163	MACN	Argentina	-22.6934	-62.2049	14/01/2000
L. bufonius	38164	MACN	Argentina	-22.6934	-62.2049	14/01/2000
L. bufonius	38165	MACN	Argentina	-22.6934	-62.2049	14/01/2000
L. bufonius	38166	MACN	Argentina	-22.6934	-62.2049	14/01/2000
L. bufonius	38167	MACN	Argentina	-22.6934	-62.2049	14/01/2000
L. bufonius	38168	MACN	Argentina	-22.6934	-62.2049	15/01/2000
L. bufonius	38169	MACN	Argentina	-22.6934	-62.2049	16/01/2000
L. bufonius	38170	MACN	Argentina	-31.9288	-68.1272	08/01/2000
L. bufonius	38171	MACN	Argentina	-31.9288	-68.1272	08/01/2000
L. bufonius	38172	MACN	Argentina	-32.3575	-66.6123	11/01/2000
L. bufonius	38173	MACN	Argentina	-32.3575	-66.6123	11/01/2000
L. bufonius	39543	MACN	Argentina	-23.3622	-63.5364	27/03/2003
L. bufonius	39544	MACN	Argentina	-23.3622	-63.5364	27/03/2003
L. bufonius	40147	MACN	Argentina	-30.843	-59.0268	03/02/2010
L. bufonius	40777	MACN	Argentina	-22.6934	-62.2049	14/01/2000
L. bufonius	40778	MACN	Argentina	-22.6934	-62.2049	14/01/2000
L. bufonius	40779	MACN	Argentina	-22.6934	-62.2049	14/01/2000
L. bufonius	40780	MACN	Argentina	-22.6934	-62.2049	14/01/2000
L. bufonius	40781	MACN	Argentina	-22.6934	-62.2049	14/01/2000
L. bufonius	40782	MACN	Argentina	-22.6934	-62.2049	14/01/2000
L. bufonius	40783	MACN	Argentina	-22.6934	-62.2049	14/01/2000
L. bufonius	40928	MACN	Argentina	-23.8958	-61.8507	09/01/2000
L. bufonius	40929	MACN	Argentina	-22.6934	-62.2049	16/01/2000
L. bufonius	40930	MACN	Argentina	-23.9735	-61.7017	18/01/2000
L. bufonius	43179	MACN	Argentina	-24.2708	-61.2173	09/01/1998
L. bufonius	43180	MACN	Argentina	-24.2708	-61.2173	09/01/1998
L. bufonius	43181	MACN	Argentina	-24.2708	-61.2173	09/01/1998
L. bufonius	43182	MACN	Argentina	-24.2708	-61.2173	09/01/1998
L. bufonius	43183	MACN	Argentina	-24.2708	-61.2173	09/01/1998
L. bufonius	43184	MACN	Argentina	-24.2708	-61.2173	09/01/1998
L. bufonius	43365	MACN	Argentina	-23.4609	-62.8676	03/01/2008
L. bufonius	43366	MACN	Argentina	-23.4609	-62.8676	20/01/2008
L. bufonius	43367	MACN	Argentina	-23.4609	-62.8676	20/01/2008
L. bufonius	43368	MACN	Argentina	-23.4609	-62.8676	20/01/2008
L. bufonius	43492	MACN	Argentina	-24.2708	-61.2173	10/01/1997
L. bufonius	43793	MACN	Argentina	-32.1984	-65.4364	29/12/2011
L. bufonius	43794	MACN	Argentina	-32.1984	-65.4364	29/12/2011
L. bufonius	43795	MACN	Argentina	-32.1982	-65.375	29/12/2011
L. bufonius	43796	MACN	Argentina	-32.1982	-65.375	29/12/2011
L. bufonius	43797	MACN	Argentina	-32.1982	-65.375	29/12/2011
L. bufonius	43798	MACN	Argentina	-32.2433	-65.3342	29/12/2011
L. bufonius	43799	MACN	Argentina	-32.2433	-65.3342	29/12/2011
L. bufonius	32190	MACN	Argentina	-25.0519	-58.1638	/5/1979
L. bufonius	26365	MACN	Argentina	-28.3698	-64.7913	6/10/1967
L. bufonius	26366	MACN	Argentina	-28.3698	-64.7913	6/10/1967
L. bufonius	46208	MACN	Argentina	-32.3096	-65.2756	14/1/2013
L. bufonius	46209	MACN	Argentina	-32.3096	-65.2756	14/1/2013
L. bufonius	46210	MACN	Argentina	-32.3096	-65.2756	14/1/2013
L. bufonius	46211	MACN	Argentina	-32.3096	-65.2756	14/1/2013
L. bufonius	46212	MACN	Argentina	-32.3096	-65.2756	14/1/2013
L. bufonius	46261	MACN	Argentina	-29.5361	-66.7682	21/1/2013
L. bufonius	46262	MACN	Argentina	-29.5361	-66.7682	21/1/2013
L. bufonius	46262	MACN	Argentina	-29.5361	-66.7682	21/1/2013
L. bufonius	94777, 94779	MZUSP	PARAGUAY	-25.3393	-57.5174
L. bufonius	83353-83354	MZUSP	PARAGUAY	-23.4899	-58.7955	1976-11-26
L. bufonius	106430-106432	MZUSP	Bolivia	-17.7504	-63.2015	17-26/01/1959
L. bufonius	21340-21341	MZUSP	Bolivia	-17.8333	-60.8		Reichle S. 2006. Distribution, diversity and conservation status of Bolivian Amphibians. D. Phil. Thesis. Rheinischen Friedrichs-Wilhelms-Universität Bonn.
L. bufonius	A.0696	MLP	Argentina	-30.5652	-63.5159	1964-12-17
L. bufonius	A.1529	MLP	Argentina	-23.6896	-62.3713	1999-12-16
L. bufonius	A.3850	MLP	Argentina	-30.0458	-66.8855	27/'2/2004
L. bufonius	A.3851	MLP	Argentina	-30.0458	-66.8855	27/'2/2004
L. bufonius	A.3857	MLP	Argentina	-30.0972	-66.9847	27/'2/2004
L. bufonius	A.4932	MLP	Argentina	-25.4788	-61.9124	00/09/2006
L. bufonius	A. 5576	MLP	Argentina	-28.0304	-58.0309	2011-11-11
L. bufonius		MLP	Argentina	-25.7556	-61.8375	2012-03-05
L. bufonius	142	L	Argentina	-25.175	-64.0789	8/II/2005
L. bufonius	110	L-SB	Argentina	-25.175	-64.0789	8/II/2005
L. bufonius	111	L-SB	Argentina	-25.175	-64.0789	8/II/2005
L. bufonius	116	L-SB	Argentina	-25.175	-64.0789	8/II/2005
L. bufonius	146	L-SB	Argentina	-25.175	-64.0789	8/II/2005
L. bufonius	17	L	Argentina	-24.0152	-63.0918	7/III/2007
L. bufonius	409	L	Argentina	-23.0344	-63.8905	25/II/2006
L. bufonius	410	L	Argentina	-23.0344	-63.8905	25/II/2006
L. bufonius	413	L	Argentina	-23.0344	-63.8905	25/II/2006
L. bufonius	417	L	Argentina	-23.0344	-63.8905	25/II/2006
L. bufonius	418	L	Argentina	-23.0344	-63.8905	25/II/2006
L. bufonius	421	L	Argentina	-23.0344	-63.8905	25/II/2006
L. bufonius	428	L	Argentina	-23.0344	-63.8905	25/II/2006
L. bufonius	436	L	Argentina	-23.0853	-63.835	25/II/2006
L. bufonius	440	L	Argentina	-23.0853	-63.835	25/II/2006
L. bufonius	457	L	Argentina	-23.8236	-63.49	27/II/2006
L. bufonius	458	L	Argentina	-23.8236	-63.49	27/II/2006
L. bufonius	460	L	Argentina	-23.8236	-63.49	27/II/2006
L. bufonius	465	L	Argentina	-23.8236	-63.49	27/II/2006
L. bufonius	477	L	Argentina	-23.8236	-63.49	27/II/2006
L. bufonius	478-508	L	Argentina	-23.8236	-63.49	27/II/2006
L. bufonius	491	L	Argentina	-23.2167	-64.1	8/II/2005
L. bufonius	493	L	Argentina	-23.2167	-64.1	8/II/2005
L. bufonius	499	L	Argentina	-23.0344	-63.8905	25/II/2006
L. bufonius	502	L	Argentina	-23.2167	-64.1	8/II/2005
L. bufonius	514	L	Argentina	-23.8236	-63.49	27/II/2006
L. bufonius	530	L	Argentina	-25.4797	-62.9324	28/II/2006
L. bufonius	534	L	Argentina	-25.4797	-62.9324	28/II/2006
L. bufonius	543	L	Argentina	-25.282	-62.7381	28/II/2006
L. bufonius	548a	L	Argentina	-27.6501	-62.4062	2006-12-02
L. bufonius	549a	L	Argentina	-27.6501	-62.4062	02/sic-06
L. bufonius	590	L	Argentina	-24.14	-62.9104	6/III/2007
L. bufonius	594	L	Argentina	-24.14	-62.9104	6/III/2007
L. bufonius	595	L	Argentina	-24.14	-62.9104	6/III/2007
L. bufonius	596	L	Argentina	-24.14	-62.9104	6/III/2007
L. bufonius	601	L	Argentina	-24.14	-62.9104	6/III/2007
L. bufonius	604	L	Argentina	-24.1743	-62.8811	6/III/2007
L. bufonius	611	L	Argentina	-24.0254	-63.0556	7/III/2007
L. bufonius	612	L	Argentina	-24.0254	-63.0556	7/III/2007
L. bufonius	625	L	Argentina	-24.0254	-63.0556	7/III/2007
L. bufonius	807	L	Argentina	-25.734	-63.9996	20-23/febrero/2010
L. bufonius	820	L	Argentina	-25.734	-63.9996	20-23/febrero/2010
L. bufonius	855	L	Argentina	-25.734	-63.9996	20-23/febrero/2010
L. bufonius	856	L	Argentina	-25.734	-63.9996	20-23/febrero/2010
L. bufonius	863	L	Argentina	-25.734	-63.9996	20-23/febrero/2010
L. bufonius	875	L	Argentina	-25.734	-63.9996	20-23/febrero/2010
L. bufonius	889	L	Argentina	-23.0853	-63.835	25/II/2006
L. bufonius	895	L	Argentina	-25.282	-62.7381	28/II/2006
L. bufonius	919	L	Argentina	-25.734	-63.9996	20-23/2/2010
L. bufonius	974	L	Argentina	-23.8236	-63.49	27/II/2006
L. bufonius	0036	JL	Argentina	-31.375	-65.4783	2008-11-01
L. bufonius	0037	JL	Argentina	-31.375	-65.4783	2008-11-01
L. bufonius	0054	JL	Argentina	-31.375	-65.4783	2004-01-01
L. bufonius	0126	JL	Argentina	-30.1834	-62.9471	2006-12-01
L. bufonius	0127	JL	Argentina	-30.1834	-62.9471	2006-12-01
L. bufonius	0128	JL	Argentina	-30.1834	-62.9471	2006-12-01
L. bufonius	0129	JL	Argentina	-30.1834	-62.9471	2006-12-01
L. bufonius	921	IIBP	Paraguay	-22.1229	-57.91451	2008-10-14
L. bufonius	922	IIBP	Paraguay	-22.1229	-57.91451	2008-10-14
L. bufonius	1491	IIBP	Paraguay	-22.6771	-59.7713	2009-02-25
L. bufonius	1492	IIBP	Paraguay	-22.6771	-59.7713	2009-02-25
L. bufonius	1603	IIBP	Paraguay	-23.4449	-59.9609	2011-10-10
L. bufonius	1604	IIBP	Paraguay	-23.4449	-59.9609	2011-10-10
L. bufonius	1619	IIBP	Paraguay	-23.4207	-59.9604	2011-10-10
L. bufonius	1622	IIBP	Paraguay	-23.4143	-59.9733	2011-10-10
L. bufonius	1623	IIBP	Paraguay	-23.4143	-59.9733	2011-10-10
L. bufonius	1624	IIBP	Paraguay	-23.4143	-59.9733	2011-10-10
L. bufonius	1625	IIBP	Paraguay	-23.4143	-59.9733	2011-10-10
L. bufonius	1626	IIBP	Paraguay	-23.4143	-59.9733	2011-10-10
L. bufonius	1627	IIBP	Paraguay	-23.4143	-59.9733	2011-10-10
L. bufonius	1649	IIBP	Paraguay	-23.082	-59.2913	2011-10-12
L. bufonius	1650	IIBP	Paraguay	-23.082	-59.2913	2011-10-12
L. bufonius	1651	IIBP	Paraguay	-23.082	-59.2913	2011-10-12
L. bufonius	1652	IIBP	Paraguay	-23.082	-59.2913	2011-10-12
L. bufonius	1653	IIBP	Paraguay	-23.082	-59.2913	2011-10-12
L. bufonius	1690	IIBP	Paraguay	-23.082	-59.2913	2011-10-13
L. bufonius	1701	IIBP	Paraguay	-22.5353	-59.8365	2011-10-14
L. bufonius	1702	IIBP	Paraguay	-22.5353	-59.8365	2011-10-14
L. bufonius	1703	IIBP	Paraguay	-22.5353	-59.8365	2011-10-14
L. bufonius	1704	IIBP	Paraguay	-22.5353	-59.8365	2011-10-14
L. bufonius	1705	IIBP	Paraguay	-22.5353	-59.8365	2011-10-14
L. bufonius	1721	IIBP	Paraguay	-22.6689	-61.5283	2011-10-25
L. bufonius	1722	IIBP	Paraguay	-22.6689	-61.5283	2011-10-25
L. bufonius	1739	IIBP	Paraguay	-22.4416	-61.7618	2011-10-26
L. bufonius	1743	IIBP	Paraguay	-22.2961	-61.7946	2011-10-26
L. bufonius	1744	IIBP	Paraguay	-22.2961	-61.7946	2011-10-26
L. bufonius	1789	IIBP	Paraguay	-22.1663	-60.4959	2011-10-30
L. bufonius	1790	IIBP	Paraguay	-22.1663	-60.4959	2011-10-30
L. bufonius	1791	IIBP	Paraguay	-22.1663	-60.4959	2011-10-30
L. bufonius	1820	IIBP	Paraguay	-22.1663	-60.4959	2011-10-30
L. bufonius	1848	IIBP	Paraguay	-22.6994	-60.5534	2011-10-31
L. bufonius	1849	IIBP	Paraguay	-22.6994	-60.5534	2011-10-31
L. bufonius	1850	IIBP	Paraguay	-22.6994	-60.5534	2011-10-31
L. bufonius	1851	IIBP	Paraguay	-22.6994	-60.5534	2011-10-31
L. bufonius	1852	IIBP	Paraguay	-22.6994	-60.5534	2011-10-31
L. bufonius	1853	IIBP	Paraguay	-22.6994	-60.5534	2011-10-31
L. bufonius	1854	IIBP	Paraguay	-22.6994	-60.5534	2011-10-31
L. bufonius	2015	IIBP	Paraguay	-23.433	-58.906	2012-10-11
L. bufonius	2016	IIBP	Paraguay	-23.433	-58.906	2012-10-11
L. bufonius	2017	IIBP	Paraguay	-23.433	-58.906	2012-10-11
L. bufonius	2018	IIBP	Paraguay	-23.433	-58.906	2012-10-11
L. bufonius	2019	IIBP	Paraguay	-23.433	-58.906	2012-10-11
L. bufonius	2020	IIBP	Paraguay	-23.433	-58.906	2012-10-11
L. bufonius	2021	IIBP	Paraguay	-23.433	-58.906	2012-10-11
L. bufonius	2022	IIBP	Paraguay	-23.433	-58.906	2012-10-11
L. bufonius	2023	IIBP	Paraguay	-23.433	-58.906	2012-10-11
L. bufonius	2024	IIBP	Paraguay	-23.433	-58.906	2012-10-11
L. bufonius	2173	IIBP	Paraguay	-22.3559	-59.4525	2013-01-02
L. bufonius	2174	IIBP	Paraguay	-22.3559	-59.4525	2013-01-02
L. bufonius	2175	IIBP	Paraguay	-22.3559	-59.4525	2013-01-02
L. bufonius	2176	IIBP	Paraguay	-22.3559	-59.4525	2013-01-02
L. bufonius	2177	IIBP	Paraguay	-22.3559	-59.4525	2013-01-02
L. bufonius	2178	IIBP	Paraguay	-22.3559	-59.4525	2013-01-02
L. bufonius	2179	IIBP	Paraguay	-22.3559	-59.4525	2013-01-02
L. bufonius	2180	IIBP	Paraguay	-22.3559	-59.4525	2013-01-02
L. bufonius	2181	IIBP	Paraguay	-22.3559	-59.4525	2013-01-02
L. bufonius	2182	IIBP	Paraguay	-22.3559	-59.4525	2013-01-02
L. bufonius	2183	IIBP	Paraguay	-22.3559	-59.4525	2013-01-02
L. bufonius	2184	IIBP	Paraguay	-22.3559	-59.4525	2013-01-02
L. bufonius	2185	IIBP	Paraguay	-22.3559	-59.4525	2013-01-02
L. bufonius	2209	IIBP	Paraguay	-21.6709	-57.9427	2013-01-04
L. bufonius	2210	IIBP	Paraguay	-21.6709	-57.9427	2013-01-04
L. bufonius	2211	IIBP	Paraguay	-21.6709	-57.9427	2013-01-04
L. bufonius	2212	IIBP	Paraguay	-21.6709	-57.9427	2013-01-04
L. bufonius	2213	IIBP	Paraguay	-21.6709	-57.9427	2013-01-04
L. bufonius	2240	IIBP	Paraguay	-21.691	-58.2976	2013-01-04
L. bufonius	2256	IIBP	Paraguay	-21.2013	-61.5974	2013-01-05
L. bufonius	2280	IIBP	Paraguay	-21.2013	-61.5974	2013-01-05
L. bufonius	2281	IIBP	Paraguay	-21.2013	-61.5974	2013-01-05
L. bufonius	2282	IIBP	Paraguay	-21.2013	-61.5974	2013-01-05
L. bufonius	2283	IIBP	Paraguay	-21.2013	-61.5974	2013-01-05
L. bufonius	2284	IIBP	Paraguay	-21.2013	-61.5974	2013-01-05
L. bufonius	2285	IIBP	Paraguay	-21.2013	-61.5974	2013-01-05
L. bufonius	2289	IIBP	Paraguay	-21.591	-62.1185	2013-01-05
L. bufonius	2295	IIBP	Paraguay	-21.591	-62.1185	2013-01-05
L. bufonius	2296	IIBP	Paraguay	-21.591	-62.1185	2013-01-05
L. bufonius	2297	IIBP	Paraguay	-21.591	-62.1185	2013-01-05
L. bufonius	2298	IIBP	Paraguay	-21.591	-62.1185	2013-01-05
L. bufonius	2299	IIBP	Paraguay	-21.591	-62.1185	2013-01-05
L. bufonius	2300	IIBP	Paraguay	-21.591	-62.1185	2013-01-05
L. bufonius	2301	IIBP	Paraguay	-21.591	-62.1185	2013-01-05
L. bufonius	2302	IIBP	Paraguay	-21.591	-62.1185	2013-01-05
L. bufonius	2305	IIBP	Paraguay	-21.591	-62.1185	2013-01-05
L. bufonius	2306	IIBP	Paraguay	-21.591	-62.1185	2013-01-05
L. bufonius	2307	IIBP	Paraguay	-21.591	-62.1185	2013-01-05
L. bufonius	2315	IIBP	Paraguay	-21.6209	-61.9837	2013-01-05
L. bufonius	2316	IIBP	Paraguay	-21.6209	-61.9837	2013-01-05
L. bufonius	2317	IIBP	Paraguay	-21.613	-62.0313	2013-01-05
L. bufonius	2340	IIBP	Paraguay	-21.1114	-61.3707	2013-01-06
L. bufonius	2341	IIBP	Paraguay	-21.1114	-61.3707	2013-01-06
L. bufonius	2342	IIBP	Paraguay	-21.1114	-61.3707	2013-01-06
L. bufonius	2343	IIBP	Paraguay	-21.1114	-61.3707	2013-01-06
L. bufonius	2344	IIBP	Paraguay	-21.1114	-61.3707	2013-01-06
L. bufonius	2352	IIBP	Paraguay	-21.1114	-61.3707	2013-01-06
L. bufonius	2353	IIBP	Paraguay	-21.1114	-61.3707	2013-01-06
L. bufonius	2355	IIBP	Paraguay	-21.1114	-61.3707	2013-01-06
L. bufonius	2363	IIBP	Paraguay	-20.5269	-60.2098	2013-01-09
L. bufonius	2364	IIBP	Paraguay	-20.5253	-60.2133	2013-01-09
L. bufonius	2369	IIBP	Paraguay	-20.5319	-60.1993	2013-01-09
L. bufonius	2370	IIBP	Paraguay	-20.5319	-60.1993	2013-01-09
L. bufonius	2373	IIBP	Paraguay	-20.5444	-60.1726	2013-01-09
L. bufonius	2376	IIBP	Paraguay	-20.5206	-60.2235	2013-01-09
L. bufonius	2385	IIBP	Paraguay	-20.5646	-60.1291	2013-01-09
L. bufonius	2426	IIBP	Paraguay	-23.0364	-59.1891	2013-01-28
L. bufonius	2430	IIBP	Paraguay	-23.0222	-59.1749	2013-01-28
L. bufonius	2431	IIBP	Paraguay	-23.0222	-59.1749	2013-01-28
L. bufonius	2433	IIBP	Paraguay	-23.0222	-59.1749	2013-01-28
L. bufonius	2435	IIBP	Paraguay	-23.0222	-59.1749	2013-01-28
L. bufonius	2436	IIBP	Paraguay	-23.0222	-59.1749	2013-01-28
L. bufonius	2437	IIBP	Paraguay	-23.0279	-59.1823	2013-01-28
L. bufonius	2470	IIBP	Paraguay	-23.0537	-59.2029	2013-01-29
L. bufonius	2473	IIBP	Paraguay	-23.0821	-59.2295	2013-01-29
L. bufonius	2474	IIBP	Paraguay	-23.0821	-59.2295	2013-01-29
L. bufonius	2475	IIBP	Paraguay	-23.0821	-59.2295	2013-01-29
L. bufonius	2823	IIBP	Paraguay	-22.5888	-61.3845	2014-01-08
L. bufonius	2824	IIBP	Paraguay	-22.5888	-61.3845	2014-01-08
L. bufonius	2825	IIBP	Paraguay	-22.5888	-61.3845	2014-01-08
L. bufonius	2826	IIBP	Paraguay	-22.5888	-61.3845	2014-01-08
L. bufonius	2827	IIBP	Paraguay	-22.5888	-61.3845	2014-01-08
L. bufonius	2828	IIBP	Paraguay	-22.5888	-61.3845	2014-01-08
L. bufonius	2829	IIBP	Paraguay	-22.5888	-61.3845	2014-01-08
L. bufonius	2830	IIBP	Paraguay	-22.5888	-61.3845	2014-01-08
L. bufonius	2831	IIBP	Paraguay	-22.5888	-61.3845	2014-01-08
L. bufonius	2832	IIBP	Paraguay	-22.5888	-61.3845	2014-01-08
L. bufonius	2833	IIBP	Paraguay	-22.5888	-61.3845	2014-01-08
L. bufonius	2834	IIBP	Paraguay	-22.5888	-61.3845	2014-01-08
L. bufonius	2835	IIBP	Paraguay	-22.5888	-61.3845	2014-01-08
L. bufonius	2838	IIBP	Paraguay	-22.6002	-61.4281	2014-01-08
L. bufonius	2844	IIBP	Paraguay	-22.6031	-61.4322	2014-01-08
L. bufonius	2845	IIBP	Paraguay	-22.6031	-61.4322	2014-01-08
L. bufonius	2846	IIBP	Paraguay	-22.6031	-61.4322	2014-01-08
L. bufonius	2847	IIBP	Paraguay	-22.6031	-61.4322	2014-01-08
L. bufonius	2856	IIBP	Paraguay	-22.6178	-61.4547	2014-01-08
L. bufonius	2871	IIBP	Paraguay	-21.6248	-59.9012	2014-01-09
L. bufonius	2872	IIBP	Paraguay	-21.6248	-59.9012	2014-01-09
L. bufonius	2873	IIBP	Paraguay	-21.6248	-59.9012	2014-01-09
L. bufonius	2874	IIBP	Paraguay	-21.6248	-59.9012	2014-01-09
L. bufonius	2875	IIBP	Paraguay	-21.6248	-59.9012	2014-01-09
L. bufonius	2876	IIBP	Paraguay	-21.6248	-59.9012	2014-01-09
L. bufonius	2877	IIBP	Paraguay	-21.6248	-59.9012	2014-01-09
L. bufonius	2881	IIBP	Paraguay	-21.5636	-59.8904	2014-01-09
L. bufonius	2882	IIBP	Paraguay	-21.5636	-59.8904	2014-01-09
L. bufonius	2883	IIBP	Paraguay	-21.5636	-59.8904	2014-01-09
L. bufonius	2898	IIBP	Paraguay	-21.4976	-59.879	2014-01-09
L. bufonius	2902	IIBP	Paraguay	-21.4131	-59.8146	2014-01-09
L. bufonius	2904	IIBP	Paraguay	-21.4084	-59.8074	2014-01-09
L. bufonius	2912	IIBP	Paraguay	-23.073	-60.7167	2014-01-10
L. bufonius	2919	IIBP	Paraguay	-23.0731	-60.6543	2014-01-10
L. bufonius	2945	IIBP	Paraguay	-23.3842	-59.9833	2014-01-13
L. bufonius	2946	IIBP	Paraguay	-23.3842	-59.9833	2014-01-13
L. bufonius	2959	IIBP	Paraguay	-23.3985	-59.9935	2014-01-13
L. bufonius	2960	IIBP	Paraguay	-23.3985	-59.9935	2014-01-13
L. bufonius	2961	IIBP	Paraguay	-23.3985	-59.9935	2014-01-13
L. bufonius	2962	IIBP	Paraguay	-23.3985	-59.9935	2014-01-13
L. bufonius	2963	IIBP	Paraguay	-23.3985	-59.9935	2014-01-13
L. bufonius	1654	IIBP	Paraguay	-23.082	-59.2913	2011-10-12
L. bufonius	2373	IIBP	Paraguay	-20.5444	-60.1726	2013-01-09
L. bufonius	2883	IIBP	Paraguay	-21.5636	-59.8904	2014-01-09
L. bufonius	327, cut 3	USNM	PARAGUAY	-22.3406	-60.0346	1982-11-28	Heyer WR, Scott Jr NJ. 2006. The advertisement call of Leptodactylus laticeps (Amphibia: Anura, Leptodactylidae): predatory aural luring? Herpetological Natural History 9:189–194.
L. bufonius	1236	CBF	Bolivia	-21.281	-63.4507		Reichle S. 2006. Distribution, diversity and conservation status of Bolivian Amphibians. D. Phil. Thesis. Rheinischen Friedrichs-Wilhelms-Universität Bonn.
L. bufonius	De la Riva 1990		Bolivia	-21.8333	-63.6167		Reichle S. 2006. Distribution, diversity and conservation status of Bolivian Amphibians. D. Phil. Thesis. Rheinischen Friedrichs-Wilhelms-Universität Bonn.
L. bufonius	De la Riva 1990		Bolivia	-20.75	-63.0667		Reichle S. 2006. Distribution, diversity and conservation status of Bolivian Amphibians. D. Phil. Thesis. Rheinischen Friedrichs-Wilhelms-Universität Bonn.
L. bufonius	De la Riva 1990		Bolivia	-18.8333	-58.6667		Reichle S. 2006. Distribution, diversity and conservation status of Bolivian Amphibians. D. Phil. Thesis. Rheinischen Friedrichs-Wilhelms-Universität Bonn.
L. bufonius	De la Riva 1990		Bolivia	-17.8333	-60.8		Reichle S. 2006. Distribution, diversity and conservation status of Bolivian Amphibians. D. Phil. Thesis. Rheinischen Friedrichs-Wilhelms-Universität Bonn.
L. bufonius	De la Riva 1990		Bolivia	-17.8	-63.1667		Reichle S. 2006. Distribution, diversity and conservation status of Bolivian Amphibians. D. Phil. Thesis. Rheinischen Friedrichs-Wilhelms-Universität Bonn.
L. bufonius	De la Riva 1990		Bolivia	-17.6667	-62.8		Reichle S. 2006. Distribution, diversity and conservation status of Bolivian Amphibians. D. Phil. Thesis. Rheinischen Friedrichs-Wilhelms-Universität Bonn.
L. bufonius	1362	MHNNKM	Bolivia	-17.4583	-62.3333	1991	Reichle S. 2006. Distribution, diversity and conservation status of Bolivian Amphibians. D. Phil. Thesis. Rheinischen Friedrichs-Wilhelms-Universität Bonn.
L. bufonius	1368	MHNNKM	Bolivia	-17.45	-63.6667	1992	Reichle S. 2006. Distribution, diversity and conservation status of Bolivian Amphibians. D. Phil. Thesis. Rheinischen Friedrichs-Wilhelms-Universität Bonn.
L. bufonius	3386	MHNNKM	Bolivia	-17.27	-58.63	1997-11-05	Reichle S. 2006. Distribution, diversity and conservation status of Bolivian Amphibians. D. Phil. Thesis. Rheinischen Friedrichs-Wilhelms-Universität Bonn.
L. bufonius	4504	MHNNKM	Bolivia	-17.7642	-63.0698		Reichle S. 2006. Distribution, diversity and conservation status of Bolivian Amphibians. D. Phil. Thesis. Rheinischen Friedrichs-Wilhelms-Universität Bonn.
L. bufonius	4646	MHNNKM	Bolivia	-18.4244	-61.9608		Reichle S. 2006. Distribution, diversity and conservation status of Bolivian Amphibians. D. Phil. Thesis. Rheinischen Friedrichs-Wilhelms-Universität Bonn.
L. bufonius	4655	MHNNKM	Bolivia	-19.615	-62.5783		Reichle S. 2006. Distribution, diversity and conservation status of Bolivian Amphibians. D. Phil. Thesis. Rheinischen Friedrichs-Wilhelms-Universität Bonn.
L. bufonius	4763	MHNNKM	Bolivia	-20.0131	-61.9042	1998-07-16	Reichle S. 2006. Distribution, diversity and conservation status of Bolivian Amphibians. D. Phil. Thesis. Rheinischen Friedrichs-Wilhelms-Universität Bonn.
L. bufonius	4827	MHNNKM	Bolivia	-18.4583	-61.3808	1998-06-13	Reichle S. 2006. Distribution, diversity and conservation status of Bolivian Amphibians. D. Phil. Thesis. Rheinischen Friedrichs-Wilhelms-Universität Bonn.
L. bufonius	5239	MHNNKM	Bolivia	-18.4311	-60.8233	1997-08-25	Reichle S. 2006. Distribution, diversity and conservation status of Bolivian Amphibians. D. Phil. Thesis. Rheinischen Friedrichs-Wilhelms-Universität Bonn.
L. bufonius	5612	MHNNKM	Bolivia	-19.6533	-62.6268		Reichle S. 2006. Distribution, diversity and conservation status of Bolivian Amphibians. D. Phil. Thesis. Rheinischen Friedrichs-Wilhelms-Universität Bonn.
L. bufonius	5644	MHNNKM	Bolivia	-19.2955	-60.62	2002-01-11	Reichle S. 2006. Distribution, diversity and conservation status of Bolivian Amphibians. D. Phil. Thesis. Rheinischen Friedrichs-Wilhelms-Universität Bonn.
L. bufonius	5694	MHNNKM	Bolivia	-18.5159	-60.81	2002-01-14	Reichle S. 2006. Distribution, diversity and conservation status of Bolivian Amphibians. D. Phil. Thesis. Rheinischen Friedrichs-Wilhelms-Universität Bonn.
L. bufonius	5754	MHNNKM	Bolivia	-19.7638	-62.5235		Reichle S. 2006. Distribution, diversity and conservation status of Bolivian Amphibians. D. Phil. Thesis. Rheinischen Friedrichs-Wilhelms-Universität Bonn.
L. bufonius	5757	MHNNKM	Bolivia	-19.3874	-62.5325	1996-10-17	Reichle S. 2006. Distribution, diversity and conservation status of Bolivian Amphibians. D. Phil. Thesis. Rheinischen Friedrichs-Wilhelms-Universität Bonn.
L. bufonius	5762	MHNNKM	Bolivia	-18.8838	-62.3797	1996-10-14	Reichle S. 2006. Distribution, diversity and conservation status of Bolivian Amphibians. D. Phil. Thesis. Rheinischen Friedrichs-Wilhelms-Universität Bonn.
L. bufonius	5767	MHNNKM	Bolivia	-19.4667	-62.35	1996-09-15	Reichle S. 2006. Distribution, diversity and conservation status of Bolivian Amphibians. D. Phil. Thesis. Rheinischen Friedrichs-Wilhelms-Universität Bonn.
L. bufonius	21054 to 21056	EBD	Bolivia	-19.4667	-62.35	1980-1990	Padial JM, Castroviejo-Fisher S, Merchan M, Cabot J, Castroviejo J. 2003. The herpetological collection from Bolivia in the “Estación Biológica de Doñana” (Spain). Graellsia 59:5–13. DOI: 10.3989/graellsia.2003.v59.i1.219.
L. bufonius			Argentina	-25.8	-62.1667	1999-2006	Kacoliris FP, Berkunsky I, Williams J. 2006. Herpetofauna of Impenetrable, Argentinean Great Chaco. Phyllomedusa 5:149–157.
L. bufonius			Argentina	-25.2667	-62.4	1999-2006	Kacoliris FP, Berkunsky I, Williams J. 2006. Herpetofauna of Impenetrable, Argentinean Great Chaco. Phyllomedusa 5:149–157.
L. bufonius			Argentina	-25.3667	-62.0333	1999-2006	Kacoliris FP, Berkunsky I, Williams J. 2006. Herpetofauna of Impenetrable, Argentinean Great Chaco. Phyllomedusa 5:149–157.
L. bufonius			Argentina	-25.3333	-62.5	1999-2006	Kacoliris FP, Berkunsky I, Williams J. 2006. Herpetofauna of Impenetrable, Argentinean Great Chaco. Phyllomedusa 5:149–157.
L. bufonius			Argentina	-25.1667	-62.8333	1999-2006	Kacoliris FP, Berkunsky I, Williams J. 2006. Herpetofauna of Impenetrable, Argentinean Great Chaco. Phyllomedusa 5:149–157.
L. bufonius			Argentina	-25.0833	-62.8333	1999-2006	Kacoliris FP, Berkunsky I, Williams J. 2006. Herpetofauna of Impenetrable, Argentinean Great Chaco. Phyllomedusa 5:149–157.
L. bufonius			Argentina	-25.1667	-63.0833	1999-2006	Kacoliris FP, Berkunsky I, Williams J. 2006. Herpetofauna of Impenetrable, Argentinean Great Chaco. Phyllomedusa 5:149–157.
L. bufonius			Argentina	-26.0167	-63.4667	1999-2006	Kacoliris FP, Berkunsky I, Williams J. 2006. Herpetofauna of Impenetrable, Argentinean Great Chaco. Phyllomedusa 5:149–157.
L. bufonius	10540-10546, 10556-10569	UFMT	Brasil	-16.4664	-58.1525	2008-2009	Pansonato A, Mott T, Strüssmann C. 2011. Anuran amphibians’ diversity in a northwestern area of the Brazilian Pantanal. Biota Neotropica 11:77–86.
L. bufonius		ZUFMS	Brasil	-22.0817	-57.9394	2008-2009	Souza FL, Uetanabaro M, Landgref-Filho P, Piatti L, Prado CPA. 2010. Herpetofauna, municipality of Porto Murtinho, Chaco region, state of Mato Grosso do Sul, Brazil. Check List 6:470–475.
L. bufonius		ZUFMS	Brasil	-22.0264	-57.9042	2008-2009	Souza FL, Uetanabaro M, Landgref-Filho P, Piatti L, Prado CPA. 2010. Herpetofauna, municipality of Porto Murtinho, Chaco region, state of Mato Grosso do Sul, Brazil. Check List 6:470–475.
L. bufonius		ZUFMS	Brasil	-22.0803	-57.8392	2008-2009	Souza FL, Uetanabaro M, Landgref-Filho P, Piatti L, Prado CPA. 2010. Herpetofauna, municipality of Porto Murtinho, Chaco region, state of Mato Grosso do Sul, Brazil. Check List 6:470–475.
L. bufonius		ZUFMS	Brasil	-22.0036	-57.7739	2008-2009	Souza FL, Uetanabaro M, Landgref-Filho P, Piatti L, Prado CPA. 2010. Herpetofauna, municipality of Porto Murtinho, Chaco region, state of Mato Grosso do Sul, Brazil. Check List 6:470–475.
L. bufonius		ZUFMS	Brasil	-21.9081	-57.8367	2008-2009	Souza FL, Uetanabaro M, Landgref-Filho P, Piatti L, Prado CPA. 2010. Herpetofauna, municipality of Porto Murtinho, Chaco region, state of Mato Grosso do Sul, Brazil. Check List 6:470–475.
L. bufonius		ZUFMS	Brasil	-21.7019	-57.7203	2008-2009	Souza FL, Uetanabaro M, Landgref-Filho P, Piatti L, Prado CPA. 2010. Herpetofauna, municipality of Porto Murtinho, Chaco region, state of Mato Grosso do Sul, Brazil. Check List 6:470–475.
L. bufonius		ZUFMS	Brasil	-21.65	-57.7119	2008-2009	Souza FL, Uetanabaro M, Landgref-Filho P, Piatti L, Prado CPA. 2010. Herpetofauna, municipality of Porto Murtinho, Chaco region, state of Mato Grosso do Sul, Brazil. Check List 6:470–475.
L. bufonius		ZUFMS	Brasil	-21.5544	-57.7808	2008-2009	Souza FL, Uetanabaro M, Landgref-Filho P, Piatti L, Prado CPA. 2010. Herpetofauna, municipality of Porto Murtinho, Chaco region, state of Mato Grosso do Sul, Brazil. Check List 6:470–475.
L. bufonius	40776	MACN	Argentina	-22.6934	-62.2049	2000-01-16
L. bufonius	444	MNHNP	Paraguay	-23.5166	-57.8663	1981-11-08
L. bufonius	445	MNHNP	Paraguay	-23.5166	-57.8663	1981-11-08
L. bufonius	446	MNHNP	Paraguay	-23.5166	-57.8663	1981-11-08
L. bufonius	447	MNHNP	Paraguay	-23.5166	-57.8663	1981-11-07
L. bufonius	449	MNHNP	Paraguay	-23.5166	-57.8663	1981-11-08
L. bufonius	456	MNHNP	Paraguay	-22.3406	-60.0346	1983-11-25
L. bufonius	457	MNHNP	Paraguay	-22.3406	-60.0346	1983-12-05
L. bufonius	458	MNHNP	Paraguay	-22.3406	-60.0346	1982-11-26
L. bufonius	461	MNHNP	Paraguay	-22.3406	-60.0346	1982-11-27
L. bufonius	462	MNHNP	Paraguay	-25.4986	-57.5598	1981-11-18
L. bufonius	463	MNHNP	Paraguay	-25.4986	-57.5598	1981-11-18
L. bufonius	464	MNHNP	Paraguay	-25.4986	-57.5598	1981-11-18
L. bufonius	465	MNHNP	Paraguay	-20.6306	-59.8813	1982-05-11
L. bufonius	469	MNHNP	Paraguay	-23.5166	-57.8663	1981-11-07
L. bufonius	471	MNHNP	Paraguay	-23.5166	-57.8663	1981-11-07
L. bufonius	473	MNHNP	Paraguay	-23.5166	-57.8663	1981-11-08
L. bufonius	477	MNHNP	Paraguay	-23.5166	-57.8663	1981-11-07
L. bufonius	479	MNHNP	Paraguay	-23.5166	-57.8663	1981-11-08
L. bufonius	481	MNHNP	Paraguay	-20.6306	-59.8813	1982-05-11
L. bufonius	490	MNHNP	Paraguay	-22.3406	-60.0346	1982-11-26
L. bufonius	491	MNHNP	Paraguay	-22.3406	-60.0346	1982-11-26
L. bufonius	494	MNHNP	Paraguay	-22.3406	-60.0346	1983-11-25
L. bufonius	495	MNHNP	Paraguay	-22.3406	-60.0346	1983-11-22
L. bufonius	496	MNHNP	Paraguay	-22.3406	-60.0346	1983-11-22
L. bufonius	787	MNHNP	Paraguay	-20.6306	-59.8813	1984-11-29
L. bufonius	4288	MNHNP	Paraguay	-23.4899	-58.7955	1993-02-18
L. bufonius	4289	MNHNP	Paraguay	-23.4899	-58.7955	1993-02-18
L. bufonius	5061	MNHNP	Paraguay	-23.3878	-57.5831	1993-10-28
L. bufonius	5062	MNHNP	Paraguay	-23.3878	-57.5831	1993-10-28
L. bufonius	5063	MNHNP	Paraguay	-23.3878	-57.5831	1993-10-27
L. bufonius	5346	MNHNP	Paraguay	-23.5166	-57.8663	1981-11-07
L. bufonius	5810	MNHNP	Paraguay	-22.3406	-60.0346	1980-11-01
L. bufonius	5812	MNHNP	Paraguay	-25.4986	-57.5598	1981-11-18
L. bufonius	5813	MNHNP	Paraguay	-25.4986	-57.5598	1981-11-18
L. bufonius	6816	MNHNP	Paraguay	-20.6307	-59.8862	1995-03-23
L. bufonius	7059	MNHNP	Paraguay	-22.3406	-60.0346	1995-03-28
L. bufonius	7071	MNHNP	Paraguay	-20.52694	-60.20981	1995-03-23
L. bufonius	7072	MNHNP	Paraguay	-20.52694	-60.20981	1995-03-23
L. bufonius	7107	MNHNP	Paraguay	-20.6307	-59.8862	1995-03-23
L. bufonius	7108	MNHNP	Paraguay	-20.6307	-59.8862	1995-03-23
L. bufonius	7180	MNHNP	Paraguay	-19.9319	-60.772	1998-10-11
L. bufonius	7181	MNHNP	Paraguay	-19.9319	-60.772	1998-10-11
L. bufonius	7182	MNHNP	Paraguay	-19.9319	-60.772	1998-10-11
L. bufonius	7345	MNHNP	Paraguay	-23.4657	-59.3321	1993-11-10
L. bufonius	7354	MNHNP	Paraguay	-23.4657	-59.3321	1993-11-10
L. bufonius	7955	MNHNP	Paraguay	-23.1484	-61.433	1990-10-19
L. bufonius	7962	MNHNP	Paraguay	-23.1484	-61.433	1990-10-19
L. bufonius	7967	MNHNP	Paraguay	-23.1484	-61.433	1990-10-19
L. bufonius	7974	MNHNP	Paraguay	-23.1484	-61.433	1990-10-19
L. bufonius	7984	MNHNP	Paraguay	-23.1484	-61.433	1990-10-19
L. bufonius	8055	MNHNP	Paraguay	-23.1484	-61.433	1990-10-19
L. bufonius	8070	MNHNP	Paraguay	-23.1484	-61.433	1990-10-19
L. bufonius	9338	MNHNP	Paraguay	-20.4799	-58.2453	1989-03-06
L. bufonius	9371	MNHNP	Paraguay	-20.4799	-58.2453	25/Eb/1989
L. bufonius	9377	MNHNP	Paraguay	-20.4799	-58.2453	1989-02-26
L. bufonius	9379	MNHNP	Paraguay	-20.4799	-58.2453	1989-03-01
L. bufonius	9402	MNHNP	Paraguay	-20.4799	-58.2453	1989-03-05
L. bufonius	10222	MNHNP	Paraguay	-20.2301	-58.1738	2002-12-05
L. bufonius	10412	MNHNP	Paraguay	-23.0757	-59.3739	15/set/1993
L. bufonius	10413	MNHNP	Paraguay	-23.0757	-59.3739	16/Set/1993
L. bufonius	10644	MNHNP	Paraguay	-22.3431	-60.3492	2003-11-08
L. bufonius	10646	MNHNP	Paraguay	-22.3431	-60.3492	2003-11-08
L. bufonius	10661	MNHNP	Paraguay	-22.0641	-59.7822	2003-10-20
L. bufonius	10664	MNHNP	Paraguay	-21.9951	-59.8424	2003-10-21
L. bufonius	10736	MNHNP	Paraguay	-21.8598	-59.9616	2004-01-17
L. bufonius	10737	MNHNP	Paraguay	-21.8715	-59.9445	2004-01-17
L. bufonius	10748	MNHNP	Paraguay	-21.8702	-59.9503	2004-01-17
L. bufonius	11005	MNHNP	Paraguay	-22.5422	-59.6799	16 de octubre de 2004
L. bufonius	11032	MNHNP	Paraguay	-23.1484	-61.433	17 de diciembre de 2004
L. bufonius	11434	MNHNP	Paraguay	-21.2106	-61.6571	2010-02-04
L. bufonius	1274	LGE	Argentina	-27.4239	-58.7444	2/XI/2000
L. bufonius	1574	LGE	Argentina	-27.4239	-58.7444	4/XII/2001
L. bufonius	2655	LGE	Argentina	-28.585	-65.2297	5/II/2004
L. bufonius	4430	LGE	Argentina	-29.1006	-60.1287	24/XI/2005
L. bufonius	4437	LGE	Argentina	-29.1006	-60.1287	24/XI/2005
L. bufonius	4798	LGE	Argentina	-25.4	-64.15	26/I/2006
L. bufonius	4856	LGE	Argentina	-23.0468	-63.8905	25/II/2006
L. bufonius	4859	LGE	Argentina	-23.0853	-63.835	25/II/2006
L. bufonius	4864	LGE	Argentina	-23.8236	-63.49	27/II/2006
L. bufonius	4866	LGE	Argentina	-23.8236	-63.49	27/II/2006
L. bufonius	4867	LGE	Argentina	-23.8236	-63.49	27/II/2006
L. bufonius	4868	LGE	Argentina	-23.8236	-63.49	27/II/2006
L. bufonius	4869	LGE	Argentina	-23.8236	-63.49	27/II/2006
L. bufonius	4870	LGE	Argentina	-23.8236	-63.49	27/II/2006
L. bufonius	4871	LGE	Argentina	-23.8236	-63.49	27/II/2006
L. bufonius	4872	LGE	Argentina	-23.8236	-63.49	27/II/2006
L. bufonius	4873	LGE	Argentina	-23.8236	-63.49	27/II/2006
L. bufonius	4874	LGE	Argentina	-23.8236	-63.49	27/II/2006
L. bufonius	4877	LGE	Argentina	-23.8236	-63.49	27/II/2006
L. bufonius	4878	LGE	Argentina	-23.8236	-63.49	27/II/2006
L. bufonius	4879	LGE	Argentina	-23.8236	-63.49	27/II/2006
L. bufonius	4880	LGE	Argentina	-23.8236	-63.49	27/II/2006
L. bufonius	4905	LGE	Argentina	-25.282	-62.7381	1/III/2006
L. bufonius	4906	LGE	Argentina	-25.282	-62.7381	1/III/2006
L. bufonius	4907	LGE	Argentina	-25.282	-62.7381	1/III/2006
L. bufonius	4908	LGE	Argentina	-25.282	-62.7381	1/III/2006
L. bufonius	4909	LGE	Argentina	-25.282	-62.7381	1/III/2006
L. bufonius	4910	LGE	Argentina	-25.282	-62.7381	1/III/2006
L. bufonius	4911	LGE	Argentina	-25.282	-62.7381	1/III/2006
L. bufonius	4917	LGE	Argentina	-23.8236	-63.49	27/II/2006
L. bufonius	4920	LGE	Argentina	-23.8236	-63.49	27/II/2006
L. bufonius	4921	LGE	Argentina	-23.8236	-63.49	27/II/2006
L. bufonius	4922	LGE	Argentina	-23.8236	-63.49	27/II/2006
L. bufonius	4923	LGE	Argentina	-23.8236	-63.49	27/II/2006
L. bufonius	4937	LGE	Argentina	-23.8236	-63.49	27/II/2006
L. bufonius	4938	LGE	Argentina	-23.8236	-63.49	27/II/2006
L. bufonius	4940	LGE	Argentina	-23.8236	-63.49	27/II/2006
L. bufonius	4984	LGE	Argentina	-22.9924	-63.8793	23/III/1999
L. bufonius	5305	LGE	Argentina	-29.21	-58.5261	17 al 20/XI/2006
L. bufonius	5331	LGE	Argentina	-29.21	-58.5261	20/XI/2006
L. bufonius	5352	LGE	Argentina	-29.21	-58.5261	17 al 20/XI/2006
L. bufonius	6280	LGE	Argentina	-25.6771	-59.0809	18/XI/2007
L. bufonius	6281	LGE	Argentina	-25.6771	-59.0809	18/XI/2007
L. bufonius	6282	LGE	Argentina	-25.6771	-59.0809	18/XI/2007
L. bufonius	6283	LGE	Argentina	-25.6771	-59.0809	18/XI/2007
L. bufonius	6284	LGE	Argentina	-25.6771	-59.0809	18/XI/2007
L. bufonius	6313	LGE	Argentina	-25.6771	-59.0809	19/XI/2007
L. bufonius	6315	LGE	Argentina	-24.5855	-60.7724	19/XI/2007
L. bufonius	6327	LGE	Argentina	-24.5855	-60.7724	19/XI/2007
L. bufonius	6328	LGE	Argentina	-24.5855	-60.7724	19/XI/2007
L. bufonius	6329	LGE	Argentina	-24.5855	-60.7724	19/XI/2007
L. bufonius	6330	LGE	Argentina	-24.5855	-60.7724	19/XI/2007
L. bufonius	6331	LGE	Argentina	-24.5855	-60.7724	19/XI/2007
L. bufonius	6336	LGE	Argentina	-24.5855	-60.7724	19/XI/2007
L. bufonius	6552	LGE	Argentina	-26.2908	-61.6961	29/XII/2007
L. bufonius	6844	LGE	Argentina	-24.4386	-61.6828	20/XI/2008
L. bufonius	6845	LGE	Argentina	-24.4386	-61.6828	20/XI/2008
L. bufonius	6849	LGE	Argentina	-24.4584	-61.6809	20/XI/2008
L. bufonius	6852	LGE	Argentina	-24.5772	-61.5469	20/XI/2008
L. bufonius	6856	LGE	Argentina	-24.5772	-61.5469	20/XI/2008
L. bufonius	6926	LGE	Argentina	-25.0694	-61.6128	18/XII/2008
L. bufonius	6927	LGE	Argentina	-25.0694	-61.6128	18/XII/2008
L. bufonius	6936	LGE	Argentina	-25.0694	-61.6128	18/XII/2008
L. bufonius	6943	LGE	Argentina	-25.0825	-61.6425	18/XII/2008
L. bufonius	6949	LGE	Argentina	-25.0825	-61.6425	18/XII/2008
L. bufonius	6953	LGE	Argentina	-24.7	-62.3258	19/XII/2008
L. bufonius	6954	LGE	Argentina	-24.7	-62.3258	19/XII/2008
L. bufonius	6964	LGE	Argentina	-24.8726	-62.3259	19/XII/2008
L. bufonius	6965	LGE	Argentina	-24.8726	-62.3259	19/XII/2008
L. bufonius	6966	LGE	Argentina	-24.8726	-62.3259	19/XII/2008
L. bufonius	6985	LGE	Argentina	-24.8726	-62.3259	19/XII/2008
L. bufonius	6986	LGE	Argentina	-24.8726	-62.3259	19/XII/2008
L. bufonius	6991	LGE	Argentina	-24.8008	-62.0811	19/XII/2008
L. bufonius	6992	LGE	Argentina	-24.8008	-62.0811	19/XII/2008
L. bufonius	7178	LGE	Argentina	-24.8325	-61.5898	26/IX/2008
L. bufonius	7290	LGE	Argentina	-24.4386	-61.6828	20/XI/2008
L. bufonius	7291	LGE	Argentina	-24.4386	-61.6828	20/XI/2008
L. bufonius	7292	LGE	Argentina	-24.4386	-61.6828	20/XI/2008
L. bufonius	7293	LGE	Argentina	-24.4386	-61.6828	20/XI/2008
L. bufonius	7294	LGE	Argentina	-24.4386	-61.6828	20/XI/2008
L. bufonius	7295	LGE	Argentina	-24.4386	-61.6828	20/XI/2008
L. bufonius	7314	LGE	Argentina	-24.4386	-61.6828	20/XI/2008
L. bufonius	7319	LGE	Argentina	-24.4584	-61.6809	20/XI/2008
L. bufonius	7320	LGE	Argentina	-24.4584	-61.6809	20/XI/2008
L. bufonius	7321	LGE	Argentina	-24.4584	-61.6809	20/XI/2008
L. bufonius	7322	LGE	Argentina	-24.5772	-61.5469	20/XI/2008
L. bufonius	7323	LGE	Argentina	-24.5772	-61.5469	20/XI/2008
L. bufonius	7336	LGE	Argentina	-24.5192	-61.8106	19/XI/2008
L. bufonius	7348	LGE	Argentina	-24.4276	-61.7306	19/XI/2008
L. bufonius	7349	LGE	Argentina	-24.4276	-61.7306	19/XI/2008
L. bufonius	7350	LGE	Argentina	-24.4276	-61.7306	19/XI/2008
L. bufonius	7351	LGE	Argentina	-24.4276	-61.7306	19/XI/2008
L. bufonius	7352	LGE	Argentina	-24.4276	-61.7306	19/XI/2008
L. bufonius	7479	LGE	Argentina	-25.0694	-61.6128	18/XII/2008
L. bufonius	7480	LGE	Argentina	-24.8008	-62.0811	19/XII/2008
L. bufonius	7481	LGE	Argentina	-25.0694	-61.6128	18/XII/2008
L. bufonius	7482	LGE	Argentina	-25.0694	-61.6128	18/XII/2008
L. bufonius	7483	LGE	Argentina	-25.0694	-61.6128	18/XII/2008
L. bufonius	7484	LGE	Argentina	-25.0694	-61.6128	18/XII/2008
L. bufonius	7485	LGE	Argentina	-24.8008	-62.0811	19/XII/2008
L. bufonius	7486	LGE	Argentina	-25.0694	-61.6128	18/XII/2008
L. bufonius	7487	LGE	Argentina	-24.7	-62.3258	19/XII/2008
L. bufonius	7488	LGE	Argentina	-25.0694	-61.6128	18/XII/2008
L. bufonius	7489	LGE	Argentina	-25.0694	-61.6128	18/XII/2008
L. bufonius	7490	LGE	Argentina	-25.0694	-61.6128	18/XII/2008
L. bufonius	7491	LGE	Argentina	-25.0694	-61.6128	18/XII/2008
L. bufonius	7654	LGE	Argentina	-28.3822	-64.5303	28/XII/2008
L. bufonius	7691	LGE	Argentina	-24.6719	-61.4608	28/I/2009
L. bufonius	7728	LGE	Argentina	-24.6719	-61.4608	28/I/2009
L. bufonius	7749	LGE	Argentina	-24.6061	-61.54	29/I/2009
L. bufonius	7765	LGE	Argentina	-24.5669	-61.5678	29/I/2009
L. bufonius	7767	LGE	Argentina	-24.5669	-61.5678	29/I/2009
L. bufonius	7768	LGE	Argentina	-24.5669	-61.5678	29/I/2009
L. bufonius	7769	LGE	Argentina	-24.5669	-61.5678	29/I/2009
L. bufonius	7770	LGE	Argentina	-24.5669	-61.5678	29/I/2009
L. bufonius	7771	LGE	Argentina	-24.5669	-61.5678	29/I/2009
L. bufonius	7772	LGE	Argentina	-24.5669	-61.5678	29/I/2009
L. bufonius	7951	LGE	Argentina	-27.525	-56.682	28/XI/2009
L. bufonius	8002	LGE	Argentina	-28.3822	-64.5303	28/XII/2008
L. bufonius	8003	LGE	Argentina	-28.3822	-64.5303	28/XII/2008
L. bufonius	8005	LGE	Argentina	-28.3822	-64.5303	28/XII/2008
L. bufonius	8006	LGE	Argentina	-28.3822	-64.5303	28/XII/2008
L. bufonius	8007	LGE	Argentina	-28.3822	-64.5303	28/XII/2008
L. bufonius	8008	LGE	Argentina	-28.3822	-64.5303	28/XII/2008
L. bufonius	8009	LGE	Argentina	-28.3822	-64.5303	28/XII/2008
L. bufonius	8010	LGE	Argentina	-28.3822	-64.5303	28/XII/2008
L. bufonius	8011	LGE	Argentina	-28.3822	-64.5303	28/XII/2008
L. bufonius	8013	LGE	Argentina	-28.3822	-64.5303	28/XII/2008
L. bufonius	8014	LGE	Argentina	-28.3822	-64.5303	28/XII/2008
L. bufonius	8015	LGE	Argentina	-28.3822	-64.5303	28/XII/2008
L. bufonius	8024	LGE	Argentina	-27.4128	-65.29	28/XII/2008
L. bufonius	8025	LGE	Argentina	-27.4128	-65.29	28/XII/2008
L. bufonius	8030	LGE	Argentina	-28.3822	-64.5303	28/XII/2008
L. bufonius	8172	LGE	Argentina	-28.5614	-59.6375	2/I/2009
L. bufonius	8173	LGE	Argentina	-28.5614	-59.6375	2/I/2009
L. bufonius	8253	LGE	Argentina	-24.9139	-61.4783	31/I/2009
L. bufonius	8343	LGE	Argentina	-25.5682	-61.4948	8/III/2009
L. bufonius	8349	LGE	Argentina	-24.6917	-61.43	10/III/2009
L. bufonius	8381	LGE	Argentina	-24.6917	-61.43	10/III/2009
L. bufonius	8389	LGE	Argentina	-25.5682	-61.4948	8/III/2009
L. bufonius	8424	LGE	Argentina	-24.4908	-61.8093	11/III/2009
L. bufonius	8426	LGE	Argentina	-24.7231	-62.1277	11/III/2009
L. bufonius	8427	LGE	Argentina	-24.4908	-61.8093	11/III/2009
L. bufonius	8428	LGE	Argentina	-24.4908	-61.8093	11/III/2009
L. bufonius	8429	LGE	Argentina	-24.4908	-61.8093	11/III/2009
L. bufonius	8430	LGE	Argentina	-24.4908	-61.8093	11/III/2009
L. bufonius	8434	LGE	Argentina	-24.7231	-62.1277	11/III/2009
L. bufonius	8435	LGE	Argentina	-24.7231	-62.1277	11/III/2009
L. bufonius	8436	LGE	Argentina	-24.7231	-62.1277	11/III/2009
L. bufonius	8437	LGE	Argentina	-24.7231	-62.1277	11/III/2009
L. bufonius	8438	LGE	Argentina	-24.7231	-62.1277	11/III/2009
L. bufonius	8439	LGE	Argentina	-24.7231	-62.1277	11/III/2009
L. bufonius	8440	LGE	Argentina	-24.7231	-62.1277	11/III/2009
L. bufonius	8441	LGE	Argentina	-24.7231	-62.1277	11/III/2009
L. bufonius	8460	LGE	Argentina	-24.8636	-61.5222	12/III/2009
L. bufonius	8461	LGE	Argentina	-24.8636	-61.5222	12/III/2009
L. bufonius	8462	LGE	Argentina	-24.8636	-61.5222	12/III/2009
L. bufonius	8463	LGE	Argentina	-24.8636	-61.5222	12/III/2009
L. bufonius	8472	LGE	Argentina	-24.8902	-61.4657	13/III/2009
L. bufonius	8473	LGE	Argentina	-24.8902	-61.4657	13/III/2009
L. bufonius	8474	LGE	Argentina	-24.8902	-61.4657	13/III/2009
L. bufonius	8475	LGE	Argentina	-24.8902	-61.4657	13/III/2009
L. bufonius	8476	LGE	Argentina	-24.8902	-61.4657	13/III/2009
L. bufonius	8477	LGE	Argentina	-24.8902	-61.4657	13/III/2009
L. bufonius	8491	LGE	Argentina	-24.8902	-61.4657	13/III/2009
L. bufonius	8492	LGE	Argentina	-24.8902	-61.4657	13/III/2009
L. bufonius	8493	LGE	Argentina	-24.8902	-61.4657	13/III/2009
L. bufonius	8495	LGE	Argentina	-24.8534	-61.5439	12/III/2009
L. bufonius	8500	LGE	Argentina	-24.4908	-61.8093	11/III/2009
L. bufonius	8514	LGE	Argentina	-24.8351	-61.584	12/III/2009
L. bufonius	8521	LGE	Argentina	-24.8351	-61.584	12/III/2009
L. bufonius	8523	LGE	Argentina	-24.7686	-61.8084	12/III/2009
L. bufonius	8524	LGE	Argentina	-24.7686	-61.8084	12/III/2009
L. bufonius	8525	LGE	Argentina	-24.7686	-61.8084	12/III/2009
L. bufonius	8531	LGE	Argentina	-24.8987	-61.3886	13/III/2009
L. bufonius	8537	LGE	Argentina	-25.3568	-61.4946	14/III/2009
L. bufonius	8538	LGE	Argentina	-25.3568	-61.4946	14/III/2009
L. bufonius	8540	LGE	Argentina	-25.0616	-61.4945	14/III/2009
L. bufonius	8542	LGE	Argentina	-25.3568	-61.4946	14/III/2009
L. bufonius	8546	LGE	Argentina	-25.0678	-61.4945	14/III/2009
L. bufonius	8547	LGE	Argentina	-25.0678	-61.4945	14/III/2009
L. bufonius	8548	LGE	Argentina	-25.0678	-61.4945	14/III/2009
L. bufonius	8549	LGE	Argentina	-25.0678	-61.4945	14/III/2009
L. bufonius	8550	LGE	Argentina	-25.0678	-61.4945	14/III/2009
L. bufonius	8551	LGE	Argentina	-25.0777	-61.4945	14/III/2009
L. bufonius	8552	LGE	Argentina	-25.0777	-61.4945	14/III/2009
L. bufonius	8563	LGE	Argentina	-25.652	-61.296	15/III/2009
L. bufonius	8564	LGE	Argentina	-25.652	-61.296	15/III/2009
L. bufonius	8565	LGE	Argentina	-25.652	-61.296	15/III/2009
L. bufonius	8581	LGE	Argentina	-25.0777	-61.4945	14/III/2009
L. bufonius	8582	LGE	Argentina	-25.0777	-61.4945	14/III/2009
L. bufonius	8583	LGE	Argentina	-25.0777	-61.4945	14/III/2009
L. bufonius	8584	LGE	Argentina	-25.0777	-61.4945	14/III/2009
L. bufonius	8585	LGE	Argentina	-25.0777	-61.4945	14/III/2009
L. bufonius	8586	LGE	Argentina	-25.0777	-61.4945	14/III/2009
L. bufonius	8587	LGE	Argentina	-25.0777	-61.4945	14/III/2009
L. bufonius	8588	LGE	Argentina	-25.0777	-61.4945	14/III/2009
L. bufonius	8589	LGE	Argentina	-25.0777	-61.4945	14/III/2009
L. bufonius	8590	LGE	Argentina	-25.0777	-61.4945	14/III/2009
L. bufonius	8591	LGE	Argentina	-25.0777	-61.4945	14/III/2009
L. bufonius	8604	LGE	Argentina	-24.8987	-61.3886	13/III/2009
L. bufonius	8605	LGE	Argentina	-24.8987	-61.3886	13/III/2009
L. bufonius	8606	LGE	Argentina	-25.3568	-61.4946	13/III/2009
L. bufonius	8607	LGE	Argentina	-24.8987	-61.3886	13/III/2009
L. bufonius	8608	LGE	Argentina	-25.3568	-61.4946	13/III/2009
L. bufonius	8615	LGE	Argentina	-24.8987	-61.3886	13/III/2009
L. bufonius	8616	LGE	Argentina	-24.8987	-61.3886	13/III/2009
L. bufonius	8617	LGE	Argentina	-24.8987	-61.3886	13/III/2009
L. bufonius	8618	LGE	Argentina	-24.8987	-61.3886	13/III/2009
L. bufonius	8619	LGE	Argentina	-24.8987	-61.3886	13/III/2009
L. bufonius	8620	LGE	Argentina	-24.8987	-61.3886	13/III/2009
L. bufonius	8621	LGE	Argentina	-24.8987	-61.3886	13/III/2009
L. bufonius	8622	LGE	Argentina	-24.8987	-61.3886	13/III/2009
L. bufonius	8623	LGE	Argentina	-24.8987	-61.3886	13/III/2009
L. bufonius	8624	LGE	Argentina	-24.8987	-61.3886	13/III/2009
L. bufonius	8625	LGE	Argentina	-24.8987	-61.3886	13/III/2009
L. bufonius	8626	LGE	Argentina	-24.8987	-61.3886	13/III/2009
L. bufonius	8627	LGE	Argentina	-24.8987	-61.3886	13/III/2009
L. bufonius	8628	LGE	Argentina	-24.8987	-61.3886	13/III/2009
L. bufonius	8629	LGE	Argentina	-24.8987	-61.3886	13/III/2009
L. bufonius	8630	LGE	Argentina	-24.8987	-61.3886	13/III/2009
L. bufonius	8631	LGE	Argentina	-24.8987	-61.3886	13/III/2009
L. bufonius	8632	LGE	Argentina	-24.8987	-61.3886	13/III/2009
L. bufonius	8633	LGE	Argentina	-24.8987	-61.3886	13/III/2009
L. bufonius	8636	LGE	Argentina	-24.8987	-61.3886	13/III/2009
L. bufonius	8637	LGE	Argentina	-24.8987	-61.3886	13/III/2009
L. bufonius	8638	LGE	Argentina	-24.8987	-61.3886	13/III/2009
L. bufonius	8639	LGE	Argentina	-24.8987	-61.3886	13/III/2009
L. bufonius	8640	LGE	Argentina	-24.8987	-61.3886	13/III/2009
L. bufonius	8641	LGE	Argentina	-24.8987	-61.3886	13/III/2009
L. bufonius	8642	LGE	Argentina	-24.8987	-61.3886	13/III/2009
L. bufonius	8643	LGE	Argentina	-24.8987	-61.3886	13/III/2009
L. bufonius	8644	LGE	Argentina	-24.8987	-61.3886	13/III/2009
L. bufonius	8645	LGE	Argentina	-24.8987	-61.3886	13/III/2009
L. bufonius	8646	LGE	Argentina	-24.8987	-61.3886	13/III/2009
L. bufonius	8647	LGE	Argentina	-24.8987	-61.3886	13/III/2009
L. bufonius	8648	LGE	Argentina	-24.8987	-61.3886	13/III/2009
L. bufonius	8649	LGE	Argentina	-24.8987	-61.3886	13/III/2009
L. bufonius	8650	LGE	Argentina	-24.8987	-61.3886	13/III/2009
L. bufonius	8651	LGE	Argentina	-24.8987	-61.3886	13/III/2009
L. bufonius	8652	LGE	Argentina	-24.8987	-61.3886	13/III/2009
L. bufonius	8653	LGE	Argentina	-24.8987	-61.3886	13/III/2009
L. bufonius	8654	LGE	Argentina	-24.8987	-61.3886	13/III/2009
L. bufonius	8655	LGE	Argentina	-24.8987	-61.3886	13/III/2009
L. bufonius	8656	LGE	Argentina	-24.8987	-61.3886	13/III/2009
L. bufonius	8657	LGE	Argentina	-24.8987	-61.3886	13/III/2009
L. bufonius	8658	LGE	Argentina	-24.8987	-61.3886	13/III/2009
L. bufonius	8660	LGE	Argentina	-24.8987	-61.3886	13/III/2009
L. bufonius	8661	LGE	Argentina	-24.8987	-61.3886	13/III/2009
L. bufonius	8662	LGE	Argentina	-24.8987	-61.3886	13/III/2009
L. bufonius	4792	LGE	Argentina	-23.1742	-64.0695	19/XII/2012
L. bufonius	4994	LGE	Argentina	-23.1742	-64.0695	18/XII/2012
L. bufonius	4995	LGE	Argentina	-23.1742	-64.0695	18/XII/2012
L. bufonius	4997	LGE	Argentina	-23.1742	-64.0695	18/XII/2012
L. bufonius	5226	LGE	Argentina	-27.26	-61.1984	15/I/2013
L. bufonius	5227	LGE	Argentina	-27.26	-61.1984	15/I/2013
L. bufonius	5231	LGE	Argentina	-27.26	-61.1984	15/I/2013
L. bufonius	5232	LGE	Argentina	-27.26	-61.1984	15/I/2013
L. bufonius	5235	LGE	Argentina	-27.293	-61.1504	15/I/2013
L. bufonius	5236	LGE	Argentina	-27.293	-61.1504	15/I/2013
L. bufonius	5242	LGE	Argentina	-27.293	-61.1504	15/I/2013
L. bufonius	5247	LGE	Argentina	-27.293	-61.1504	15/I/2013
L. bufonius	5248	LGE	Argentina	-27.293	-61.1504	15/I/2013
L. bufonius	5249	LGE	Argentina	-27.293	-61.1504	15/I/2013
L. bufonius	5250	LGE	Argentina	-27.293	-61.1504	15/I/2013
L. bufonius	5251	LGE	Argentina	-27.293	-61.1504	15/I/2013
L. bufonius	5252	LGE	Argentina	-27.293	-61.1504	15/I/2013
L. bufonius	5253	LGE	Argentina	-27.293	-61.1504	15/I/2013
L. bufonius	5254	LGE	Argentina	-27.293	-61.1504	15/I/2013
L. bufonius	5255	LGE	Argentina	-27.293	-61.1504	15/I/2013
L. bufonius	5262	LGE	Argentina	-27.4027	-60.9318	15/I/2013
L. bufonius	5325	LGE	Argentina	-27.5442	-60.7714	16/I/2013
L. bufonius	5326	LGE	Argentina	-27.5442	-60.7714	16/I/2013
L. bufonius	5411	LGE	Argentina	-28.4732	-61.9562	18/I/2013
L. bufonius	5412	LGE	Argentina	-28.4732	-61.9562	18/I/2013
L. bufonius	5413	LGE	Argentina	-28.4732	-61.9562	18/I/2013
L. bufonius	5414	LGE	Argentina	-28.4732	-61.9562	18/I/2013
L. bufonius	5415	LGE	Argentina	-28.4732	-61.9562	18/I/2013
L. bufonius	5416	LGE	Argentina	-28.4732	-61.9562	18/I/2013
L. bufonius	5417	LGE	Argentina	-28.4732	-61.9562	18/I/2013
L. bufonius	5418	LGE	Argentina	-28.4732	-61.9562	18/I/2013
L. bufonius	5419	LGE	Argentina	-28.4732	-61.9562	18/I/2013
L. bufonius	5420	LGE	Argentina	-27.8023	-61.0877	17/I/2013
L. bufonius	5421	LGE	Argentina	-27.8023	-61.0877	17/I/2013
L. bufonius	5424	LGE	Argentina	-28.4732	-61.9562	18/I/2013
L. bufonius	5434	LGE	Argentina	-28.4732	-61.9562	18/I/2013
L. bufonius	5435	LGE	Argentina	-28.4732	-61.9562	18/I/2013
L. bufonius	5436	LGE	Argentina	-28.4732	-61.9562	18/I/2013
L. bufonius	5437	LGE	Argentina	-28.4732	-61.9562	18/I/2013
L. bufonius	5438	LGE	Argentina	-28.4732	-61.9562	18/I/2013
L. bufonius	5441	LGE	Argentina	-28.4732	-61.9562	18/I/2013
L. bufonius	5442	LGE	Argentina	-28.4732	-61.9562	18/I/2013
L. bufonius	5443	LGE	Argentina	-28.4732	-61.9562	18/I/2013
L. bufonius	5444	LGE	Argentina	-28.4732	-61.9562	18/I/2013
L. bufonius	5445	LGE	Argentina	-28.4732	-61.9562	18/I/2013
L. bufonius	5450	LGE	Argentina	-28.4807	-62.117	18/I/2013
L. bufonius	5451	LGE	Argentina	-28.4807	-62.117	18/I/2013
L. bufonius	5452	LGE	Argentina	-28.4807	-62.117	18/I/2013
L. bufonius	5453	LGE	Argentina	-28.4807	-62.117	18/I/2013
L. bufonius	5455	LGE	Argentina	-28.4712	-62.1085	18/I/2013
L. bufonius	5456	LGE	Argentina	-28.4712	-62.1085	18/I/2013
L. bufonius	5459	LGE	Argentina	-28.4732	-61.9562	18/I/2013
L. bufonius	5461	LGE	Argentina	-28.4807	-62.117	18/I/2013
L. bufonius	5497	LGE	Argentina	-28.5076	-62.1343	18/I/2013
L. bufonius	5498	LGE	Argentina	-28.5076	-62.1343	18/I/2013
L. bufonius	5511	LGE	Argentina	-28.4732	-61.9562	18/I/2013
L. bufonius	5516	LGE	Argentina	-29.5928	-61.9562	21/I/2013
L. bufonius	5517	LGE	Argentina	-29.5928	-61.9562	21/I/2013
L. bufonius	5518	LGE	Argentina	-29.5928	-61.9562	21/I/2013
L. bufonius	5519	LGE	Argentina	-29.5928	-61.9562	21/I/2013
L. bufonius	5520	LGE	Argentina	-29.5928	-61.9562	21/I/2013
L. bufonius	5521	LGE	Argentina	-29.5928	-61.9562	21/I/2013
L. bufonius	5523	LGE	Argentina	-29.5928	-61.9562	21/I/2013
L. bufonius	5524	LGE	Argentina	-29.6385	-66.6816	21/I/2013
L. bufonius	5525	LGE	Argentina	-29.6385	-66.6816	21/I/2013
L. bufonius	5526	LGE	Argentina	-29.6385	-66.6816	21/I/2013
L. bufonius	5527	LGE	Argentina	-29.6385	-66.6816	21/I/2013
L. bufonius	5528	LGE	Argentina	-29.6385	-66.6816	21/I/2013
L. bufonius	5529	LGE	Argentina	-29.6385	-66.6816	21/I/2013
L. bufonius	5543	LGE	Argentina	-29.194	-65.7993	22/I/2013
L. bufonius	5544	LGE	Argentina	-29.194	-65.7993	22/I/2013
L. bufonius	5545	LGE	Argentina	-29.194	-65.7993	22/I/2013
L. bufonius	5563	LGE	Argentina	-29.194	-65.7993	22/I/2013
L. bufonius	5564	LGE	Argentina	-29.194	-65.7993	22/I/2013
L. bufonius	5566	LGE	Argentina	-29.194	-65.7993	22/I/2013
L. bufonius	5567	LGE	Argentina	-29.194	-65.7993	22/I/2013
L. bufonius	5568	LGE	Argentina	-29.194	-65.7993	22/I/2013
L. bufonius	5569	LGE	Argentina	-29.194	-65.7993	22/I/2013
L. bufonius	5570	LGE	Argentina	-29.194	-65.7993	22/I/2013
L. bufonius	5571	LGE	Argentina	-29.194	-65.7993	22/I/2013
L. bufonius	5572	LGE	Argentina	-29.194	-65.7993	22/I/2013
L. bufonius	5581	LGE	Argentina	-29.7829	-66.5882	21/I/2013
L. bufonius	5588	LGE	Argentina	-29.2225	-65.7977	23/I/2013
L. bufonius	5627	LGE	Argentina	-27.6254	-62.4286	24/I/2013
L. bufonius	5639	LGE	Argentina	-29.2225	-65.7977	23/I/2013
L. bufonius	5640	LGE	Argentina	-28.4807	-62.117	18/I/2013
L. bufonius	5641	LGE	Argentina	-28.4807	-62.117	18/I/2013
L. bufonius	5642	LGE	Argentina	-28.4807	-62.117	18/I/2013
L. bufonius	5643	LGE	Argentina	-28.4807	-62.117	18/I/2013
L. bufonius	5644	LGE	Argentina	-28.4807	-62.117	18/I/2013
L. bufonius	5645	LGE	Argentina	-28.4807	-62.117	18/I/2013
L. bufonius	5646	LGE	Argentina	-28.4807	-62.117	18/I/2013
L. bufonius	5647	LGE	Argentina	-28.4807	-62.117	18/I/2013
L. bufonius	5648	LGE	Argentina	-28.4807	-62.117	18/I/2013
L. bufonius	5649	LGE	Argentina	-28.4807	-62.117	18/I/2013
L. bufonius	5650	LGE	Argentina	-28.4807	-62.117	18/I/2013
L. bufonius	5651	LGE	Argentina	-28.4807	-62.117	18/I/2013
L. bufonius	5652	LGE	Argentina	-28.4807	-62.117	18/I/2013
L. bufonius	5653	LGE	Argentina	-28.4807	-62.117	18/I/2013
L. bufonius	5654	LGE	Argentina	-28.4807	-62.117	18/I/2013
L. bufonius	5655	LGE	Argentina	-28.4807	-62.117	18/I/2013
L. bufonius	5656	LGE	Argentina	-28.4807	-62.117	18/I/2013
L. bufonius	5657	LGE	Argentina	-28.4807	-62.117	18/I/2013
L. bufonius	5658	LGE	Argentina	-28.4807	-62.117	18/I/2013
L. bufonius	5659	LGE	Argentina	-28.4807	-62.117	18/I/2013
L. bufonius	5660	LGE	Argentina	-28.4807	-62.117	18/I/2013
L. bufonius	5699	LGE	Argentina	-27.5541	-60.8145	16/I/2013
L. bufonius	5700	LGE	Argentina	-27.5541	-60.8145	16/I/2013
L. bufonius	5701	LGE	Argentina	-27.5541	-60.8145	16/I/2013
L. bufonius	5702	LGE	Argentina	-27.5541	-60.8145	16/I/2013
L. bufonius	5703	LGE	Argentina	-27.5541	-60.8145	16/I/2013
L. bufonius	5704	LGE	Argentina	-27.5541	-60.8145	16/I/2013
L. bufonius	5705	LGE	Argentina	-27.5541	-60.8145	16/I/2013
L. bufonius	5706	LGE	Argentina	-27.5541	-60.8145	16/I/2013
L. bufonius	5707	LGE	Argentina	-27.5541	-60.8145	16/I/2013
L. bufonius	5708	LGE	Argentina	-27.5541	-60.8145	16/I/2013
L. bufonius	5709	LGE	Argentina	-27.5541	-60.8145	16/I/2013
L. bufonius	5710	LGE	Argentina	-27.5541	-60.8145	16/I/2013
L. bufonius	5721	LGE	Argentina	-28.4732	-61.9562	18/I/2013
L. bufonius	5722	LGE	Argentina	-28.4732	-61.9562	18/I/2013
L. bufonius	5723	LGE	Argentina	-28.4732	-61.9562	18/I/2013
L. bufonius	5724	LGE	Argentina	-28.4732	-61.9562	18/I/2013
L. bufonius	5725	LGE	Argentina	-28.4732	-61.9562	18/I/2013
L. bufonius	5726	LGE	Argentina	-28.4732	-61.9562	18/I/2013
L. bufonius	5727	LGE	Argentina	-28.4732	-61.9562	18/I/2013
L. bufonius	5728	LGE	Argentina	-28.4732	-61.9562	18/I/2013
L. bufonius	5729	LGE	Argentina	-28.4732	-61.9562	18/I/2013
L. bufonius	5730	LGE	Argentina	-28.4732	-61.9562	18/I/2013
L. bufonius	5731	LGE	Argentina	-28.4732	-61.9562	18/I/2013
L. bufonius	5732	LGE	Argentina	-28.4732	-61.9562	18/I/2013
L. bufonius	5733	LGE	Argentina	-28.4732	-61.9562	18/I/2013
L. bufonius	5734	LGE	Argentina	-28.4732	-61.9562	18/I/2013
L. bufonius	5735	LGE	Argentina	-28.4732	-61.9562	18/I/2013
L. bufonius	5736	LGE	Argentina	-28.4732	-61.9562	18/I/2013
L. bufonius	5737	LGE	Argentina	-28.4732	-61.9562	18/I/2013
L. bufonius	5738	LGE	Argentina	-28.4732	-61.9562	18/I/2013
L. bufonius	5739	LGE	Argentina	-28.4732	-61.9562	18/I/2013
L. bufonius	5740	LGE	Argentina	-28.4732	-61.9562	18/I/2013
L. bufonius	5741	LGE	Argentina	-28.4732	-61.9562	18/I/2013
L. bufonius	5742	LGE	Argentina	-28.4732	-61.9562	18/I/2013
L. bufonius	5743	LGE	Argentina	-28.4732	-61.9562	18/I/2013
L. bufonius	5744	LGE	Argentina	-28.4732	-61.9562	18/I/2013
L. bufonius	5745	LGE	Argentina	-28.4732	-61.9562	18/I/2013
L. bufonius	5746	LGE	Argentina	-28.4732	-61.9562	18/I/2013
L. bufonius	5747	LGE	Argentina	-28.4732	-61.9562	18/I/2013
L. bufonius	5748	LGE	Argentina	-28.4732	-61.9562	18/I/2013
L. bufonius	5749	LGE	Argentina	-28.4732	-61.9562	18/I/2013
L. bufonius	5750	LGE	Argentina	-28.4732	-61.9562	18/I/2013
L. bufonius	5751	LGE	Argentina	-28.4732	-61.9562	18/I/2013
L. bufonius	5752	LGE	Argentina	-28.4732	-61.9562	18/I/2013
L. bufonius	5753	LGE	Argentina	-28.4732	-61.9562	18/I/2013
L. bufonius	5754	LGE	Argentina	-28.4732	-61.9562	18/I/2013
L. bufonius	5755	LGE	Argentina	-28.4732	-61.9562	18/I/2013
L. bufonius	5767	LGE	Argentina	-27.7781	-61.0458	17/I/2013
L. bufonius	5768	LGE	Argentina	-27.7781	-61.0458	17/I/2013
L. bufonius	5769	LGE	Argentina	-28.4732	-61.9562	18/I/2013
L. bufonius	5770	LGE	Argentina	-28.4732	-61.9562	18/I/2013
L. bufonius	5771	LGE	Argentina	-28.4732	-61.9562	18/I/2013
L. bufonius	5772	LGE	Argentina	-28.4732	-61.9562	18/I/2013
L. bufonius	5773	LGE	Argentina	-28.4732	-61.9562	18/I/2013
L. bufonius	5774	LGE	Argentina	-28.4732	-61.9562	18/I/2013
L. bufonius	5775	LGE	Argentina	-28.4732	-61.9562	18/I/2013
L. bufonius	5776	LGE	Argentina	-28.4732	-61.9562	18/I/2013
L. bufonius	5777	LGE	Argentina	-28.4732	-61.9562	18/I/2013
L. bufonius	5778	LGE	Argentina	-28.4732	-61.9562	18/I/2013
L. bufonius	5779	LGE	Argentina	-28.4732	-61.9562	18/I/2013
L. bufonius	5780	LGE	Argentina	-28.4732	-61.9562	18/I/2013
L. bufonius	5781	LGE	Argentina	-28.4732	-61.9562	18/I/2013
L. bufonius	5782	LGE	Argentina	-28.4732	-61.9562	18/I/2013
L. bufonius	5783	LGE	Argentina	-28.4732	-61.9562	18/I/2013
L. bufonius	5784	LGE	Argentina	-28.4732	-61.9562	18/I/2013
L. bufonius	5785	LGE	Argentina	-28.4732	-61.9562	18/I/2013
L. bufonius	5786	LGE	Argentina	-28.4732	-61.9562	18/I/2013
L. bufonius	5787	LGE	Argentina	-28.4732	-61.9562	18/I/2013
L. bufonius	5788	LGE	Argentina	-28.4732	-61.9562	18/I/2013
L. bufonius	5789	LGE	Argentina	-28.4732	-61.9562	18/I/2013
L. bufonius	5790	LGE	Argentina	-28.4732	-61.9562	18/I/2013
L. bufonius	5791	LGE	Argentina	-28.4732	-61.9562	18/I/2013
L. bufonius	5792	LGE	Argentina	-28.4732	-61.9562	18/I/2013
L. bufonius	5793	LGE	Argentina	-28.4732	-61.9562	18/I/2013
L. bufonius	5794	LGE	Argentina	-28.4732	-61.9562	18/I/2013
L. bufonius	5828	LGE	Argentina	-29.7444	-63.7261	20/I/2013
L. bufonius	5863	LGE	Argentina	-25.4928	-62.9644	12/I/2013
L. bufonius	5864	LGE	Argentina	-25.4928	-62.9644	12/I/2013
L. bufonius	5865	LGE	Argentina	-25.4928	-62.9644	12/I/2013
L. bufonius	5866	LGE	Argentina	-25.4928	-62.9644	12/I/2013
L. bufonius	5867	LGE	Argentina	-25.4928	-62.9644	12/I/2013
L. bufonius	5868	LGE	Argentina	-25.4928	-62.9644	12/I/2013
L. bufonius	5869	LGE	Argentina	-25.4928	-62.9644	12/I/2013
L. bufonius	5870	LGE	Argentina	-25.4928	-62.9644	12/I/2013
L. bufonius	5871	LGE	Argentina	-25.4928	-62.9644	12/I/2013
L. bufonius	5872	LGE	Argentina	-25.4928	-62.9644	12/I/2013
L. bufonius	5873	LGE	Argentina	-25.4928	-62.9644	12/I/2013
L. bufonius	5874	LGE	Argentina	-25.4928	-62.9644	12/I/2013
L. bufonius	5875	LGE	Argentina	-25.4928	-62.9644	12/I/2013
L. bufonius	5876	LGE	Argentina	-25.4928	-62.9644	12/I/2013
L. bufonius	5877	LGE	Argentina	-25.4928	-62.9644	12/I/2013
L. bufonius	5878	LGE	Argentina	-25.4928	-62.9644	12/I/2013
L. bufonius	5879	LGE	Argentina	-25.4928	-62.9644	12/I/2013
L. bufonius	5880	LGE	Argentina	-25.4928	-62.9644	12/I/2013
L. bufonius	5881	LGE	Argentina	-25.4928	-62.9644	12/I/2013
L. bufonius	5882	LGE	Argentina	-25.4928	-62.9644	12/I/2013
L. bufonius	5883	LGE	Argentina	-25.4928	-62.9644	12/I/2013
L. bufonius	5886	LGE	Argentina	-25.0776	-61.6312	13/I/2013
L. bufonius	5887	LGE	Argentina	-25.0776	-61.6312	13/I/2013
L. bufonius	5888	LGE	Argentina	-25.0776	-61.6312	13/I/2013
L. bufonius	5889	LGE	Argentina	-25.0776	-61.6312	13/I/2013
L. bufonius	5890	LGE	Argentina	-25.0776	-61.6312	13/I/2013
L. bufonius	5891	LGE	Argentina	-25.0776	-61.6312	13/I/2013
L. bufonius	5892	LGE	Argentina	-25.0776	-61.6312	13/I/2013
L. bufonius	5893	LGE	Argentina	-25.0776	-61.6312	13/I/2013
L. bufonius	5894	LGE	Argentina	-25.0776	-61.6312	13/I/2013
L. bufonius	5895	LGE	Argentina	-25.0776	-61.6312	13/I/2013
L. bufonius	5896	LGE	Argentina	-25.0776	-61.6312	13/I/2013
L. bufonius	5897	LGE	Argentina	-25.0776	-61.6312	13/I/2013
L. bufonius	5898	LGE	Argentina	-25.0776	-61.6312	13/I/2013
L. bufonius	5899	LGE	Argentina	-25.0776	-61.6312	13/I/2013
L. bufonius	5902	LGE	Argentina	-25.0776	-61.6312	13/I/2013
L. bufonius	5903	LGE	Argentina	-25.0776	-61.6312	13/I/2013
L. bufonius	5904	LGE	Argentina	-25.0776	-61.6312	13/I/2013
L. bufonius	5905	LGE	Argentina	-25.0776	-61.6312	13/I/2013
L. bufonius	5906	LGE	Argentina	-25.0776	-61.6312	13/I/2013
L. bufonius	5907	LGE	Argentina	-25.0776	-61.6312	13/I/2013
L. bufonius	5908	LGE	Argentina	-25.0776	-61.6312	13/I/2013
L. bufonius	5909	LGE	Argentina	-25.0776	-61.6312	13/I/2013
L. bufonius	5910	LGE	Argentina	-25.0776	-61.6312	13/I/2013
L. bufonius	5911	LGE	Argentina	-25.0776	-61.6312	13/I/2013
L. bufonius	5912	LGE	Argentina	-25.0776	-61.6312	13/I/2013
L. bufonius	5913	LGE	Argentina	-25.0776	-61.6312	13/I/2013
L. bufonius	5914	LGE	Argentina	-25.0776	-61.6312	13/I/2013
L. bufonius	5915	LGE	Argentina	-25.0776	-61.6312	13/I/2013
L. bufonius	5916	LGE	Argentina	-25.0776	-61.6312	13/I/2013
L. bufonius	5917	LGE	Argentina	-25.0776	-61.6312	13/I/2013
L. bufonius	5918	LGE	Argentina	-25.0776	-61.6312	13/I/2013
L. bufonius	5919	LGE	Argentina	-25.0776	-61.6312	13/I/2013
L. bufonius	5920	LGE	Argentina	-25.0776	-61.6312	13/I/2013
L. bufonius	5921	LGE	Argentina	-25.0776	-61.6312	13/I/2013
L. bufonius	5922	LGE	Argentina	-25.0776	-61.6312	13/I/2013
L. bufonius	5923	LGE	Argentina	-25.0776	-61.6312	13/I/2013
L. bufonius	5924	LGE	Argentina	-25.0776	-61.6312	13/I/2013
L. bufonius	5925	LGE	Argentina	-25.0776	-61.6312	13/I/2013
L. bufonius	5926	LGE	Argentina	-25.0776	-61.6312	13/I/2013
L. bufonius	5927	LGE	Argentina	-25.0776	-61.6312	13/I/2013
L. bufonius	7389	LGE	Argentina	-29.6206	-64.8361	2/XI/2013
L. bufonius	8050	LGE	Argentina	-25.5094	-58.9859	28/I/2014
L. bufonius	8051	LGE	Argentina	-25.5094	-58.9859	28/I/2014
L. bufonius	8079	LGE	Argentina	-24.5656	-60.637	29/I/2014
L. bufonius	8091	LGE	Argentina	-24.5656	-60.637	29/I/2014
L. bufonius	8092	LGE	Argentina	-24.5485	-60.6418	29/I/2014
L. bufonius	8095	LGE	Argentina	-24.6284	-60.618	29/I/2014
L. bufonius	8096	LGE	Argentina	-24.6284	-60.618	29/I/2014
L. bufonius	8097	LGE	Argentina	-24.6284	-60.618	29/I/2014
L. bufonius	8098	LGE	Argentina	-24.6284	-60.618	29/I/2014
L. bufonius	8101	LGE	Argentina	-24.5952	-60.6291	29/I/2014
L. bufonius	8102	LGE	Argentina	-24.5952	-60.6291	29/I/2014
L. bufonius	8118	LGE	Argentina	-24.5456	-60.6426	29/I/2014
L. bufonius	8119	LGE	Argentina	-24.5456	-60.6426	29/I/2014
L. bufonius	8155	LGE	Argentina	-24.5641	-60.6374	30/I/2014
L. bufonius	8168	LGE	Argentina	-24.2197	-61.2112	30/I/2014
L. bufonius	8177	LGE	Argentina	-24.5641	-60.6374	30/I/2014
L. bufonius	8191	LGE	Argentina	-24.2197	-61.2112	30/I/2014
L. bufonius	8192	LGE	Argentina	-24.2197	-61.2112	30/I/2014
L. bufonius	8193	LGE	Argentina	-24.2197	-61.2112	30/I/2014
L. bufonius	8194	LGE	Argentina	-24.2197	-61.2112	30/I/2014
L. bufonius	8218	LGE	Argentina	-23.297	-63.252	31/I/2014
L. bufonius	8228	LGE	Argentina	-23.297	-63.252	31/I/2014
L. bufonius	8229	LGE	Argentina	-23.297	-63.252	31/I/2014
L. bufonius	8238	LGE	Argentina	-23.3769	-63.0847	31/I/2014
L. bufonius	8239	LGE	Argentina	-23.3769	-63.0847	31/I/2014
L. bufonius	8261	LGE	Argentina	-26.5685	-62.7677	1/II/2014
L. bufonius	8262	LGE	Argentina	-26.5685	-62.7677	1/II/2014
L. bufonius	8263	LGE	Argentina	-26.5685	-62.7677	1/II/2014
L. bufonius	8269	LGE	Argentina	-26.5685	-62.7677	1/II/2014
L. bufonius	8270	LGE	Argentina	-26.5685	-62.7677	1/II/2014
L. bufonius	8277	LGE	Argentina	-27.1182	-62.848	2/II/2014
L. bufonius	8278	LGE	Argentina	-27.1182	-62.848	2/II/2014
L. bufonius	8279	LGE	Argentina	-27.1182	-62.848	2/II/2014
L. bufonius	8280	LGE	Argentina	-27.1182	-62.848	2/II/2014
L. bufonius	8281	LGE	Argentina	-27.1182	-62.848	2/II/2014
L. bufonius	8283	LGE	Argentina	-27.1392	-63.0561	2/II/2014
L. bufonius	8285	LGE	Argentina	-26.8446	-62.9304	3/II/2014
L. bufonius	8288	LGE	Argentina	-26.8964	-62.9244	3/II/2014
L. bufonius	8289	LGE	Argentina	-26.8964	-62.9244	3/II/2014
L. bufonius	8290	LGE	Argentina	-26.8964	-62.9244	3/II/2014
L. bufonius	8291	LGE	Argentina	-27.0037	-62.7519	3/II/2014
L. bufonius	8292	LGE	Argentina	-27.0037	-62.7519	3/II/2014
L. bufonius	8300	LGE	Argentina	-26.8446	-62.9304	3/II/2014
L. bufonius	8301	LGE	Argentina	-26.8446	-62.9304	3/II/2014
L. bufonius	8302	LGE	Argentina	-26.8446	-62.9304	3/II/2014
L. bufonius	8306	LGE	Argentina	-26.8446	-62.9304	3/II/2014
L. bufonius	8307	LGE	Argentina	-26.8446	-62.9304	3/II/2014
L. bufonius	8342	LGE	Argentina	-27.6424	-63.4806	4/II/2014
L. bufonius	8346	LGE	Argentina	-27.726	-63.5059	4/II/2014
L. bufonius	8347	LGE	Argentina	-27.8222	-63.4718	4/II/2014
L. bufonius	8365	LGE	Argentina	-23.297	-63.252	31/I/2014
L. bufonius	8366	LGE	Argentina	-23.297	-63.252	31/I/2014
L. bufonius	8367	LGE	Argentina	-23.297	-63.252	31/I/2014
L. bufonius	8388	LGE	Argentina	-23.726	-63.5059	4/II/2014
L. bufonius	8399	LGE	Argentina	-26.5136	-61.1693	13/II/2014
L. bufonius	8400	LGE	Argentina	-26.5136	-61.1693	13/II/2014
L. bufonius	467	MNHNP	Paraguay	-20.6306	-59.8813	1982-05-12
L. bufonius	489	MNHNP	Paraguay	-24.5228	-58.6654	09/Set/1982
L. bufonius	493	MNHNP	Paraguay	-24.5228	-58.6654	05/Set/1982
L. bufonius	3552	MNHNP	Paraguay	-20.6306	-59.8813	1Jun-25Jul/1983
L. bufonius	8116	MNHNP	Paraguay	-23.4247	-58.9252	1992-02-18
L. bufonius	8126	MNHNP	Paraguay	-23.4247	-58.9252	1992-02-18
L. bufonius	8142	MNHNP	Paraguay	-23.4247	-58.9252	1992-02-18
L. bufonius	8143	MNHNP	Paraguay	-23.4247	-58.9252	1992-02-18
L. bufonius	8163	MNHNP	Paraguay	-23.4247	-58.9252	1992-02-18
L. bufonius	10137	MNHNP	Paraguay	-24.4208	-58.0609	2002-11-08
L. bufonius	10138	MNHNP	Paraguay	-24.4208	-58.0609	2002-11-08
L. bufonius	10139	MNHNP	Paraguay	-24.4208	-58.0609	2002-11-08
L. chaquensis	01833	FML	Bolivia	-17.3701	-63.3001	1962-01-01
L. chaquensis	09949	FML	Bolivia	-22.5107	-64.3937	1996-04-22
L. chaquensis	09950	FML	Bolivia	-22.5107	-64.3937	1996-04-22
L. chaquensis	5959	MACN	Paraguay	-25.2836	-57.6456
L. chaquensis	5960	MACN	Paraguay	-25.2836	-57.6456
L. chaquensis	5961	MACN	Paraguay	-25.2836	-57.6456
L. chaquensis	5962	MACN	Paraguay	-25.2836	-57.6456
L. chaquensis	5963	MACN	Paraguay	-25.2836	-57.6456
L. chaquensis	8123	MACN	Paraguay	-22.3411	-58.2116	12/09/1944
L. chaquensis	8124	MACN	Paraguay	-22.3411	-58.2116	12/09/1944
L. chaquensis	8125	MACN	Paraguay	-22.3411	-58.2116	12/09/1944
L. chaquensis	8126	MACN	Paraguay	-22.3411	-58.2116	12/09/1944
L. chaquensis	8127	MACN	Paraguay	-22.3411	-58.2116	12/09/1944
L. chaquensis	8128	MACN	Paraguay	-22.3411	-58.2116	12/09/1944
L. chaquensis	8129	MACN	Paraguay	-22.3411	-58.2116	12/09/1944
L. chaquensis	8130	MACN	Paraguay	-22.3411	-58.2116	12/09/1944
L. chaquensis	8131	MACN	Paraguay	-22.3411	-58.2116	12/09/1944
L. chaquensis	8132	MACN	Paraguay	-22.3411	-58.2116	12/09/1944
L. chaquensis	02232	FML	Argentina	-34.5047	-58.7725	1950-03-05
L. chaquensis	94778	MZUSP	PARAGUAY	-25.3393	-57.5174
L. chaquensis	00121	FML	Argentina	-24.9586	-60.9401	1944-12-13
L. chaquensis	04349	FML	Argentina	-26.5564	-60.3059	1987-11-23
L. chaquensis	05845	FML	Argentina	-26.7961	-59.6275	1995-03-22
L. chaquensis	05856	FML	Argentina	-27.321	-58.9549	1995-04-01
L. chaquensis	03564	FML	Argentina	-26.5564	-60.3059	1985-10-31
L. chaquensis	43407	MACN	Argentina	-26.7912	-60.4388	05/01/1998
L. chaquensis	43408	MACN	Argentina	-26.7912	-60.4388	05/01/1998
L. chaquensis	43409	MACN	Argentina	-26.7912	-60.4388	05/01/1998
L. chaquensis	22974	FML	Argentina	-26.7912	-60.4388	1981-01-01
L. chaquensis	22975	FML	Argentina	-26.7912	-60.4388	1981-01-01
L. chaquensis	05565	FML	Argentina	-26.8246	-60.4246	1989-12-02
L. chaquensis	04292	FML	Argentina	-26.7912	-60.4388	1987-11-24
L. chaquensis	06804	FML	Argentina	-26.7912	-60.4388	1995-12-27
L. chaquensis	8736	MACN	Argentina	-27.3256	-61.2826	6/12/1946
L. chaquensis	8737	MACN	Argentina	-27.3256	-61.2826	6/12/1946
L. chaquensis	8738	MACN	Argentina	-27.3256	-61.2826	6/12/1946
L. chaquensis	03562	FML	Argentina	-25.9531	-60.6294	1985-11-02
L. chaquensis	00247	FML	Argentina	-26.5749	-59.6311	1945-09-07
L. chaquensis	00406	FML	Argentina	-26.4968	-59.6765	1945-08-01
L. chaquensis	39715	MACN	Argentina	-26.8256	-59.135	/12/2008
L. chaquensis	39716	MACN	Argentina	-26.8256	-59.135	/12/2008
L. chaquensis	39717	MACN	Argentina	-26.8256	-59.135	/12/2008
L. chaquensis	32350	MACN	Argentina	-26.8215	-59.663	/10/1982
L. chaquensis	00764	FML	Argentina	-27.4213	-58.8354	1949-11-02
L. chaquensis	29784	MACN	Argentina	-27.465	-58.99	14/12/1971
L. chaquensis	29785	MACN	Argentina	-27.465	-58.99	10/12/1971
L. chaquensis	29786	MACN	Argentina	-27.465	-58.99	10/12/1971
L. chaquensis	29787	MACN	Argentina	-27.465	-58.99	10/12/1971
L. chaquensis	29789	MACN	Argentina	-27.465	-58.99	10/12/1971
L. chaquensis	29790	MACN	Argentina	-27.465	-58.99	10/12/1971
L. chaquensis	29791	MACN	Argentina	-27.465	-58.99	10/12/1971
L. chaquensis	24042-49, 24051-054, 24053-055, 24057, 24060-064, 24067-075, 24076-086, 24088, 24090-097	MZUSP	Argentina	-27.4818	-58.9321	1961
L. chaquensis	24034-24041	MZUSP	Argentina	-27.4972	-58.9282	1961
L. chaquensis	01363	FML	Argentina	-32.1929	-64.4837	1968-02-01
L. chaquensis	01365	FML	Argentina	-32.1929	-64.4837	1966-02-01
L. chaquensis	00767	FML	Argentina	-31.4253	-62.112	1949-11-16
L. chaquensis	00002	FML	Argentina	-28.6817	-57.8581	1943-06-06
L. chaquensis	21421	MACN	Argentina	-28.6817	-57.8581	/10/1959
L. chaquensis	21422	MACN	Argentina	-28.6817	-57.8581	/10/1959
L. chaquensis	21180	MACN	Argentina	-28.9885	-57.643	26/12/1964
L. chaquensis	21181	MACN	Argentina	-28.9885	-57.643	26/12/1964
L. chaquensis	22933	MACN	Argentina	-36.0644	-60.0589	/12/1965
L. chaquensis	22934	MACN	Argentina	-36.0644	-60.0589	/12/1965
L. chaquensis	22935	MACN	Argentina	-36.0644	-60.0589	/12/1965
L. chaquensis	22936	MACN	Argentina	-36.0644	-60.0589	/12/1965
L. chaquensis	22937	MACN	Argentina	-36.0644	-60.0589	/12/1965
L. chaquensis	22938	MACN	Argentina	-36.0644	-60.0589	/12/1965
L. chaquensis	22939	MACN	Argentina	-36.0644	-60.0589	/12/1965
L. chaquensis	22940	MACN	Argentina	-36.0644	-60.0589	/12/1965
L. chaquensis	34387	MACN	Argentina	-28.0178	-58.0303	/03/1992
L. chaquensis	34388	MACN	Argentina	-28.0178	-58.0303	/03/1992
L. chaquensis	34389	MACN	Argentina	-28.0178	-58.0303	/03/1992
L. chaquensis	34390	MACN	Argentina	-28.0178	-58.0303	/03/1992
L. chaquensis	34391	MACN	Argentina	-28.0178	-58.0303	/03/1992
L. chaquensis	22819	MACN	Argentina	-30.2539	-57.6362	/11/1965
L. chaquensis	22820	MACN	Argentina	-30.2539	-57.6362	/11/1965
L. chaquensis	45360	MACN	Argentina	-28.596	-59.0308	15/1/2013
L. chaquensis	45361	MACN	Argentina	-28.596	-59.0308	15/1/2013
L. chaquensis	45362	MACN	Argentina	-28.596	-59.0308	15/1/2013
L. chaquensis	45363	MACN	Argentina	-28.596	-59.0308	15/1/2013
L. chaquensis	45364	MACN	Argentina	-28.596	-59.0308	15/1/2013
L. chaquensis	20290	FML	Argentina	-27.5529	-58.6795	1987-11-01
L. chaquensis	20291	FML	Argentina	-27.5529	-58.6795	1987-11-01
L. chaquensis	20292	FML	Argentina	-27.5529	-58.6795	1987-11-01
L. chaquensis	20293	FML	Argentina	-27.5529	-58.6795	1987-11-01
L. chaquensis	20294	FML	Argentina	-27.5529	-58.6795	1987-11-01
L. chaquensis	22562	MACN	Argentina	-29.7878	-58.0615	11/09/1965
L. chaquensis	22563	MACN	Argentina	-29.7878	-58.0615	11/11/1965
L. chaquensis	22564	MACN	Argentina	-29.7878	-58.0615	11/11/1965
L. chaquensis	22565	MACN	Argentina	-29.7878	-58.0615	11/11/1965
L. chaquensis	21298	MACN	Argentina	-27.9508	-58.8007	07/01/1965
L. chaquensis	21299	MACN	Argentina	-27.9508	-58.8007	07/01/1965
L. chaquensis	21300	MACN	Argentina	-27.9508	-58.8007	07/01/1965
L. chaquensis	21301	MACN	Argentina	-27.9508	-58.8007	07/01/1965
L. chaquensis	21302	MACN	Argentina	-27.9508	-58.8007	07/01/1965
L. chaquensis	21303	MACN	Argentina	-27.9508	-58.8007	07/01/1965
L. chaquensis	21304	MACN	Argentina	-27.9508	-58.8007	07/01/1965
L. chaquensis	21305	MACN	Argentina	-27.9508	-58.8007	07/01/1965
L. chaquensis	21306	MACN	Argentina	-27.9508	-58.8007	07/01/1965
L. chaquensis	21307	MACN	Argentina	-27.9508	-58.8007	07/01/1965
L. chaquensis	21308	MACN	Argentina	-27.9508	-58.8007	07/01/1965
L. chaquensis	21309	MACN	Argentina	-27.9508	-58.8007	07/01/1965
L. chaquensis	21310	MACN	Argentina	-27.9508	-58.8007	07/01/1965
L. chaquensis	29549	MACN	Argentina	-27.4724	-57.3377	17/07/1971
L. chaquensis	21341	MACN	Argentina	-27.7498	-57.6204	07/01/1965
L. chaquensis	22976	FML	Argentina	-29.1323	-59.2652	1990-08-18
L. chaquensis	21249	MACN	Argentina	-27.2732	-58.2433	01/01/1965
L. chaquensis	21250	MACN	Argentina	-27.2732	-58.2433	01/01/1965
L. chaquensis	21251	MACN	Argentina	-27.2732	-58.2433	01/01/1965
L. chaquensis	21252	MACN	Argentina	-27.2732	-58.2433	01/01/1965
L. chaquensis	21253	MACN	Argentina	-27.2732	-58.2433	01/01/1965
L. chaquensis	21254	MACN	Argentina	-27.2732	-58.2433	01/01/1965
L. chaquensis	21255	MACN	Argentina	-27.2732	-58.2433	01/01/1965
L. chaquensis	21256	MACN	Argentina	-27.2732	-58.2433	01/01/1965
L. chaquensis	21257	MACN	Argentina	-27.2732	-58.2433	01/01/1965
L. chaquensis	21258	MACN	Argentina	-27.2732	-58.2433	01/01/1965
L. chaquensis	21259	MACN	Argentina	-27.2732	-58.2433	01/01/1965
L. chaquensis	21260	MACN	Argentina	-27.2732	-58.2433	01/01/1965
L. chaquensis	21261	MACN	Argentina	-27.2732	-58.2433	01/01/1965
L. chaquensis	21262	MACN	Argentina	-27.2732	-58.2433	01/01/1965
L. chaquensis	21263	MACN	Argentina	-27.2732	-58.2433	01/01/1965
L. chaquensis	21264	MACN	Argentina	-27.2732	-58.2433	01/01/1965
L. chaquensis	21265	MACN	Argentina	-27.2732	-58.2433	01/01/1965
L. chaquensis	33977	MACN	Argentina	-27.2732	-58.2433	/07/1987
L. chaquensis	00923	FML	Argentina	-27.5087	-56.8658	1950-10-15
L. chaquensis	00766	FML	Argentina	-27.607	-56.6943	1949-11-07
L. chaquensis	00976	FML	Argentina	-27.607	-56.6943	1946-12-01
L. chaquensis	15685	FML	Argentina	-28.9889	-59.0923	2004-04-23
L. chaquensis	00579	FML	Argentina	-27.9224	-58.1015	1948-10-24
L. chaquensis	00581	FML	Argentina	-27.9224	-58.1015	1948-11-16
L. chaquensis	00582	FML	Argentina	-27.9224	-58.1015	1948-12-09
L. chaquensis	00585	FML	Argentina	-27.9224	-58.1015	1948-10-25
L. chaquensis	00654	FML	Argentina	-27.9224	-58.1015	1949-04-09
L. chaquensis	00898	FML	Argentina	-27.9224	-58.1015	1950-08-31
L. chaquensis	00933	FML	Argentina	-27.9224	-58.1015	1950-11-14
L. chaquensis	22710	MACN	Argentina	-29.187	-58.0801	08/11/1965
L. chaquensis	22711	MACN	Argentina	-29.187	-58.0801	08/11/1965
L. chaquensis	22712	MACN	Argentina	-29.187	-58.0801	08/11/1965
L. chaquensis	22713	MACN	Argentina	-29.187	-58.0801	08/11/1965
L. chaquensis	22714	MACN	Argentina	-29.187	-58.0801	08/11/1965
L. chaquensis	22715	MACN	Argentina	-29.187	-58.0801	08/11/1965
L. chaquensis	00812	FML	Argentina	-27.4885	-58.7166	1949-12-22
L. chaquensis	23044	MACN	Argentina	-28.536	-57.1743	/12/1965
L. chaquensis	23045	MACN	Argentina	-28.536	-57.1743	/12/1965
L. chaquensis	23046	MACN	Argentina	-28.536	-57.1743	/12/1965
L. chaquensis	23047	MACN	Argentina	-28.536	-57.1743	/12/1965
L. chaquensis	23048	MACN	Argentina	-28.536	-57.1743	/12/1965
L. chaquensis	23049	MACN	Argentina	-28.536	-57.1743	/12/1965
L. chaquensis	23050	MACN	Argentina	-28.536	-57.1743	/12/1965
L. chaquensis	23051	MACN	Argentina	-28.536	-57.1743	/12/1965
L. chaquensis	23052	MACN	Argentina	-28.536	-57.1743	/12/1965
L. chaquensis	23053	MACN	Argentina	-28.536	-57.1743	/12/1965
L. chaquensis	23054	MACN	Argentina	-28.536	-57.1743	/12/1965
L. chaquensis	23055	MACN	Argentina	-28.536	-57.1743	/12/1965
L. chaquensis	23056	MACN	Argentina	-28.536	-57.1743	/12/1965
L. chaquensis	23057	MACN	Argentina	-28.536	-57.1743	/12/1965
L. chaquensis	00770	FML	Argentina	-28.5364	-57.1871	1949-11-03
L. chaquensis	45977	MACN	Argentina	-28.5364	-57.1871	23/1/2001
L. chaquensis	45978	MACN	Argentina	-28.5364	-57.1871	23/1/2001
L. chaquensis	45979	MACN	Argentina	-28.5364	-57.1871	23/1/2001
L. chaquensis	45980	MACN	Argentina	-28.5364	-57.1871	23/1/2001
L. chaquensis	45981	MACN	Argentina	-28.5364	-57.1871	23/1/2001
L. chaquensis	45982	MACN	Argentina	-28.5364	-57.1871	23/1/2001
L. chaquensis	45983	MACN	Argentina	-28.5364	-57.1871	23/1/2001
L. chaquensis	39464	MACN	Argentina	-27.7106	-57.1877	07/04/1999
L. chaquensis	39465	MACN	Argentina	-27.7106	-57.1877	27/09/1999
L. chaquensis	15687	FML	Argentina	-28.5544	-56.0268	2004-04-16
L. chaquensis	00763	FML	Argentina	-30.087	-58.7942	1949-11-14
L. chaquensis	23552	MACN	Argentina	-30.5262	-58.3743	19/05/1966
L. chaquensis	23553	MACN	Argentina	-30.5262	-58.3743	21/05/1966
L. chaquensis	23554	MACN	Argentina	-30.5262	-58.3743	21/05/1966
L. chaquensis	23555	MACN	Argentina	-30.5262	-58.3743	24/05/1966
L. chaquensis	23556	MACN	Argentina	-30.5262	-58.3743	24/05/1966
L. chaquensis	00749	FML	Argentina	-30.7467	-59.6257	1949-06-13
L. chaquensis	40452	MACN	Argentina	-30.9485	-59.5113	28/03/2010
L. chaquensis	40434	MACN	Argentina	-30.9239	-59.551	28/03/2010
L. chaquensis	40436	MACN	Argentina	-30.9239	-59.551	28/03/2010
L. chaquensis	40437	MACN	Argentina	-30.9239	-59.551	28/03/2010
L. chaquensis	40438	MACN	Argentina	-30.9239	-59.551	28/03/2010
L. chaquensis	40439	MACN	Argentina	-30.9239	-59.551	28/03/2010
L. chaquensis	40440	MACN	Argentina	-30.9239	-59.551	28/03/2010
L. chaquensis	40441	MACN	Argentina	-30.9239	-59.551	28/03/2010
L. chaquensis	40442	MACN	Argentina	-30.9239	-59.551	28/03/2010
L. chaquensis	40445	MACN	Argentina	-30.9239	-59.551	28/03/2010
L. chaquensis	38397	MACN	Argentina	-31.537	-59.2354	23/02/2001
L. chaquensis	40477	MACN	Argentina	-31.9862	-58.9638	28/03/2010
L. chaquensis	40479	MACN	Argentina	-31.9862	-58.9638	28/03/2010
L. chaquensis	39644	MACN	Argentina	-31.9862	-58.9638	07/12/2008
L. chaquensis	01068	FML	Argentina	-26.1783	-58.1623	1951-11-21
L. chaquensis	00139	FML	Argentina	-25.3763	-59.2045	1944-11-22
L. chaquensis	00154	FML	Argentina	-25.3763	-59.2045	1944-11-23
L. chaquensis	05839	FML	Argentina	-25.167	-58.1309	1994-02-14
L. chaquensis	00580	FML	Argentina	-23.2167	-61.7333	1948-11-26
L. chaquensis	01085	FML	Argentina	-24.9992	-59.9994	1951-11-19
L. chaquensis	38393	MACN	Argentina	-23.9739	-61.7011	18/01/2000
L. chaquensis	01047	FML	Argentina	-24.4369	-61.4537	1951-10-18
L. chaquensis	03566	FML	Argentina	-24.2708	-61.2173	1985-11-11
L. chaquensis	01063	FML	Argentina	-23.6333	-61.3666	1951-11-01
L. chaquensis	01066	FML	Argentina	-23.5694	-61.7063	1951-11-04
L. chaquensis	00929	FML	Argentina	-26.2484	-58.2106	1950-11-10
L. chaquensis	04483	FML	Argentina	-26.0317	-58.1894	1989-01-04
L. chaquensis	04512	FML	Argentina	-26.0317	-58.1894	1988-12-01
L. chaquensis	15344	FML	Argentina	-26.3057	-58.8312	2002-09-10
L. chaquensis	15347	FML	Argentina	-26.3057	-58.8312	2002-10-10
L. chaquensis	15356	FML	Argentina	-26.3057	-58.8312	2002-10-10
L. chaquensis	15373	FML	Argentina	-26.3057	-58.8312	2004-01-09
L. chaquensis	15461	FML	Argentina	-26.3057	-58.8312	2002-09-10
L. chaquensis	15469	FML	Argentina	-26.3057	-58.8312	2004-09-10
L. chaquensis	15591	FML	Argentina	-26.3057	-58.8312	2002-11-15
L. chaquensis	15599	FML	Argentina	-26.3057	-58.8312	2002-11-15
L. chaquensis	15602	FML	Argentina	-26.3057	-58.8312	2002-11-15
L. chaquensis	23988	FML	Argentina	-26.3057	-58.8312	2010-12-06
L. chaquensis	23989	FML	Argentina	-26.3057	-58.8312	2010-12-06
L. chaquensis	23990	FML	Argentina	-26.3057	-58.8312	2010-12-06
L. chaquensis	24067	FML	Argentina	-26.3057	-58.8312	2011-01-23
L. chaquensis	15837	MACN	Argentina	-23.8958	-61.8507	/04/1960
L. chaquensis	15838	MACN	Argentina	-23.8958	-61.8507	/04/1960
L. chaquensis	15839	MACN	Argentina	-23.8958	-61.8507	/04/1960
L. chaquensis	15840	MACN	Argentina	-23.8958	-61.8507	/04/1960
L. chaquensis	15841	MACN	Argentina	-23.8958	-61.8507	/04/1960
L. chaquensis	15842	MACN	Argentina	-23.8958	-61.8507	/04/1960
L. chaquensis	15843	MACN	Argentina	-23.8958	-61.8507	/04/1960
L. chaquensis	01091	FML	Argentina	-23.9062	-61.8509	1951-11-27
L. chaquensis	00868	FML	Argentina	-24.0276	-61.9189	1950-09-01
L. chaquensis	02977	FML	Argentina	-24.0276	-61.9189	1950-09-01
L. chaquensis	00584	FML	Argentina	-24.1963	-62.013	1948-11-26
L. chaquensis	00261	FML	Argentina	-24.9656	-59.457	1945-09-20
L. chaquensis	34117	MACN	Argentina	-24.7053	-60.5939	/11/1987
L. chaquensis	34118	MACN	Argentina	-24.7053	-60.5939	/11/1987
L. chaquensis	04245	FML	Argentina	-24.7053	-60.5939	1987-12-08
L. chaquensis	03238	FML	Argentina	-25.2782	-59.7533	1981-11-17
L. chaquensis	38394	MACN	Argentina	-24.9824	-58.5514	20/01/2000
L. chaquensis	38395	MACN	Argentina	-24.9824	-58.5514	21/01/2000
L. chaquensis	38396	MACN	Argentina	-24.9824	-58.5514	21/01/2000
L. chaquensis	03567	FML	Argentina	-24.9846	-58.8221	1985-11-08
L. chaquensis	34699	MACN	Argentina	-25.7793	-57.932	14/03/1993
L. chaquensis	36619	MACN	Argentina	-24.8835	-58.3604	/07/1995
L. chaquensis	36620	MACN	Argentina	-24.8835	-58.3604	/07/1995
L. chaquensis	03563	FML	Argentina	-25.3701	-57.6521	1985-11-05
L. chaquensis	00899	FML	Argentina	-25.4227	-57.7906	1950-08-20
L. chaquensis	01144	FML	Argentina	-25.4227	-57.7906	1950-08-20
L. chaquensis	08085	FML	Argentina	-25.75	-59.1167	1999-02-23
L. chaquensis	12127	FML	Argentina	-25.75	-59.1167	1999-02-23
L. chaquensis	39554	MACN	Argentina	-23.2661	-62.1331	19/08/2001
L. chaquensis	38392	MACN	Argentina	-22.6934	-62.2049	14/01/2000
L. chaquensis	01270	FML	Argentina	-23.7241	-64.6065	1966-01-17
L. chaquensis	25099	FML	Argentina	-24.1724	-65.3328	2007-12-14
L. chaquensis	25100	FML	Argentina	-24.1724	-65.3328	2007-12-14
L. chaquensis	01612	FML	Argentina	-24.4273	-65.2966	1965-12-23
L. chaquensis	24639	FML	Argentina	-24.5115	-65.0844	2012-02-23
L. chaquensis	24640	FML	Argentina	-24.5115	-65.0844	2012-02-23
L. chaquensis	24641	FML	Argentina	-24.5115	-65.0844	2012-02-23
L. chaquensis	01267	FML	Argentina	-23.6132	-64.5263	1966-01-08
L. chaquensis	25390	MACN	Argentina	-23.9419	-64.8019	/10/1967
L. chaquensis	18295	FML	Argentina	-23.7614	-64.8492	2007-02-28
L. chaquensis	01271	FML	Argentina	-23.6604	-64.5553	1966-01-22
L. chaquensis	01269	FML	Argentina	-23.6483	-64.4665	1966-01-10
L. chaquensis	01669	FML	Argentina	-23.6483	-64.4665	1966-01-01
L. chaquensis	03839	FML	Argentina	-24.2725	-64.7147	1987-10-18
L. chaquensis	61017	MZUSP	Brasil	-18.4993	-54.7363	00/12/1967
L. chaquensis	61020	MZUSP	Brasil	-18.4993	-54.7363	00/10/1982
L. chaquensis	65048-65059	MZUSP	Brasil	-19.9551	-56.3038	5-10/01/1988
L. chaquensis	65019-65047	MZUSP	Brasil	-19.9551	-56.3038	1987-1988
L. chaquensis	143813	MZUSP	Brasil	-13.9497	-51.9184
L. chaquensis	152072-75	MZUSP	Brasil	-15.6916	-52.2849	2008
L. chaquensis	143791	MZUSP	Brasil	-15.7679	-52.0884	2009-01-30
L. chaquensis	149192	MZUSP	Brasil	-13.7035	-60.4376	2009-11-06
L. chaquensis	149006-149008	MZUSP	Brasil	-15.1199	-56.6335	2010-09-08
L. chaquensis	148884, 148885	MZUSP	Brasil	-14.8433	-59.9511	20-26/11/2009
L. chaquensis	148832-148835,	MZUSP	Brasil	-14.8433	-59.9511	20-26/11/2009
L. chaquensis	148635	MZUSP	Brasil	-15.1599	-57.7469	2009-12-12
L. chaquensis	61240-61247	MZUSP	Brasil	-17.3626	-56.7748	1985-12-14
L. chaquensis	139010-139013	MZUSP	Brasil	-15.114	-58.9614
L. chaquensis	61225	MZUSP	Brasil	-15.0088	-59.9505	1985-12-11
L. chaquensis	91465-91486	MZUSP	Brasil	-15.0088	-59.9505	07-22/9/1997
L. chaquensis	151881-151882	MZUSP	Brasil	-15.4802	-44.3389	2012-08-13
L. chaquensis	151889-151890	MZUSP	Brasil	-15.9268	-44.0013	2012-08-09
L. chaquensis	148668	MZUSP	Brasil	-8.95276	-63.8668	2010-01-09
L. chaquensis	146036	MZUSP	Brasil	-9.23147	-64.6178	2011-01-25
L. chaquensis	34276	MACN	Argentina	-22.5865	-63.86	09/05/1985
L. chaquensis	34277	MACN	Argentina	-22.5865	-63.86	09/05/1985
L. chaquensis	34299	MACN	Argentina	-23.2662	-64.1438	15/05/1983
L. chaquensis	9749	MACN	Argentina	-23.5568	-64.4004
L. chaquensis	05611	FML	Argentina	-25.1014	-64.2259	1988-01-26
L. chaquensis	05612	FML	Argentina	-25.1031	-64.2359	1988-01-26
L. chaquensis	18493	FML	Argentina	-25.0965	-64.1972	1988-01-26
L. chaquensis	06485	FML	Argentina	-25.0965	-64.1972	1988-01-26
L. chaquensis	05337	FML	Argentina	-24.7175	-63.3093	1993-01-16
L. chaquensis	11168	FML	Argentina	-25.108	-64.138	2002-02-22
L. chaquensis	11169	FML	Argentina	-25.108	-64.138	2002-02-22
L. chaquensis	05669	FML	Argentina	-25.1578	-64.0905	1988-04-03
L. chaquensis	05686	FML	Argentina	-25.1578	-64.0905	1988-05-06
L. chaquensis	05710	FML	Argentina	-25.1578	-64.0905	1988-03-14
L. chaquensis	05712	FML	Argentina	-25.1578	-64.0905	1988-03-17
L. chaquensis	05718	FML	Argentina	-25.1578	-64.0905	1988-03-19
L. chaquensis	05640	FML	Argentina	-25.1578	-64.0905	1988-11-18
L. chaquensis	05641	FML	Argentina	-25.0965	-64.1972	1988-11-22
L. chaquensis	05626	FML	Argentina	-25.0965	-64.1972	1987-11-23
L. chaquensis	16074	FML	Argentina	-25.1195	-64.1285	2005-02-07
L. chaquensis	16075	FML	Argentina	-25.1195	-64.1285	2005-02-07
L. chaquensis	16076	FML	Argentina	-25.1195	-64.1285	2005-02-07
L. chaquensis	16077	FML	Argentina	-25.1195	-64.1285	2005-02-07
L. chaquensis	16079	FML	Argentina	-25.1195	-64.1285	2005-02-07
L. chaquensis	24152	FML	Argentina	-24.7175	-63.3093	2001-12-20
L. chaquensis	05635	FML	Argentina	-25.1204	-64.2246	1989-03-10
L. chaquensis	34004	MACN	Argentina	-23.4334	-62.9716	29/11/1990
L. chaquensis	34005	MACN	Argentina	-23.4334	-62.9716	29/11/1990
L. chaquensis	34006	MACN	Argentina	-23.4334	-62.9716	29/11/1990
L. chaquensis	34007	MACN	Argentina	-23.4334	-62.9716	29/11/1990
L. chaquensis	34008	MACN	Argentina	-23.4334	-62.9716	29/11/1990
L. chaquensis	34009	MACN	Argentina	-23.4334	-62.9716	29/11/1990
L. chaquensis	45800	MACN	Argentina	-23.2491	-63.3389	3/1/2008
L. chaquensis	04640	FML	Argentina	-23.21	-64.0964	1989-12-21
L. chaquensis	08012	FML	Argentina	-23.1667	-64.0667	1999-02-19
L. chaquensis	08013	FML	Argentina	-23.1667	-64.0667	1999-02-19
L. chaquensis	08014	FML	Argentina	-23.1667	-64.0667	1999-02-19
L. chaquensis	08097	FML	Argentina	-23.1667	-64.0667	1999-02-20
L. chaquensis	04812	FML	Argentina	-23.208	-64.0935	1989-12-19
L. chaquensis	04813	FML	Argentina	-23.208	-64.0935	1989-12-19
L. chaquensis	04816	FML	Argentina	-23.208	-64.0935	1989-12-20
L. chaquensis	12201	FML	Argentina	-23.208	-64.0935	1999-02-19
L. chaquensis	12202	FML	Argentina	-23.208	-64.0935	1999-02-19
L. chaquensis	12203	FML	Argentina	-23.208	-64.0935	1999-02-19
L. chaquensis	12204	FML	Argentina	-23.208	-64.0935	1999-02-19
L. chaquensis	08950	FML	Argentina	-23.2151	-63.5675	1950-03-21
L. chaquensis	08951	FML	Argentina	-23.2151	-63.5675	1950-03-21
L. chaquensis	08952	FML	Argentina	-23.2151	-63.5675	1950-03-21
L. chaquensis	08953	FML	Argentina	-23.2151	-63.5675	1950-03-21
L. chaquensis	08954	FML	Argentina	-23.2151	-63.5675	1950-03-21
L. chaquensis	08955	FML	Argentina	-23.2151	-63.5675	1950-03-21
L. chaquensis	08956	FML	Argentina	-23.2151	-63.5675	1950-03-21
L. chaquensis	08957	FML	Argentina	-23.2151	-63.5675	1950-03-21
L. chaquensis	08958	FML	Argentina	-23.2151	-63.5675	1950-03-21
L. chaquensis	08959	FML	Argentina	-23.2151	-63.5675	1950-03-21
L. chaquensis	99	FML	Argentina	-22.7916	-65.218	1944-08-28
L. chaquensis	04818	FML	Argentina	-23.2472	-64.139	1989-12-21
L. chaquensis	00440	FML	Argentina	-23.3003	-63.6815	1947-02-06
L. chaquensis	00554	FML	Argentina	-22.1512	-63.7128	1948-04-03
L. chaquensis	04810	FML	Argentina	-25.3902	-64.643	1989-12-13
L. chaquensis	04811	FML	Argentina	-25.3902	-64.643	1989-12-14
L. chaquensis	34300	MACN	Argentina	-25.484	-64.7063	23/05/1983
L. chaquensis	00860	FML	Argentina	-25.3229	-64.9066	1950-03-31
L. chaquensis	00864	FML	Argentina	-25.3229	-64.9066	1950-04-10
L. chaquensis	17491	MACN	Argentina	-22.8644	-64.3414	01/10/1963
L. chaquensis	17492	MACN	Argentina	-22.8644	-64.3414	01/10/1963
L. chaquensis	17493	MACN	Argentina	-22.8644	-64.3414	01/10/1963
L. chaquensis	17494	MACN	Argentina	-22.8644	-64.3414	01/10/1963
L. chaquensis	17495	MACN	Argentina	-22.8644	-64.3414	01/10/1963
L. chaquensis	17496	MACN	Argentina	-22.8644	-64.3414	01/10/1963
L. chaquensis	17497	MACN	Argentina	-22.8644	-64.3414	01/10/1963
L. chaquensis	17498	MACN	Argentina	-22.8644	-64.3414	01/10/1963
L. chaquensis	17499	MACN	Argentina	-22.8644	-64.3414	01/10/1963
L. chaquensis	17500	MACN	Argentina	-22.8644	-64.3414	01/10/1963
L. chaquensis	17501	MACN	Argentina	-22.8644	-64.3414	01/10/1963
L. chaquensis	17502	MACN	Argentina	-22.8644	-64.3414	01/10/1963
L. chaquensis	17503	MACN	Argentina	-22.8644	-64.3414	01/10/1963
L. chaquensis	17504	MACN	Argentina	-22.8644	-64.3414	01/10/1963
L. chaquensis	17505	MACN	Argentina	-22.8644	-64.3414	01/10/1963
L. chaquensis	17506	MACN	Argentina	-22.8644	-64.3414	01/10/1963
L. chaquensis	17507	MACN	Argentina	-22.8644	-64.3414	01/10/1963
L. chaquensis	17508	MACN	Argentina	-22.8644	-64.3414	01/10/1963
L. chaquensis	17509	MACN	Argentina	-22.8644	-64.3414	01/10/1963
L. chaquensis	17510	MACN	Argentina	-22.8644	-64.3414	01/10/1963
L. chaquensis	17511	MACN	Argentina	-22.8644	-64.3414	01/10/1963
L. chaquensis	17512	MACN	Argentina	-22.8644	-64.3414	01/10/1963
L. chaquensis	17513	MACN	Argentina	-22.8644	-64.3414	01/10/1963
L. chaquensis	02753	FML	Argentina	-22.7176	-64.5395	1979-10-05
L. chaquensis	04942	FML	Argentina	-22.7176	-64.5395	1978-12-14
L. chaquensis	10397	FML	Argentina	-23.1	-64.5332	2001-10-03
L. chaquensis	10398	FML	Argentina	-23.1	-64.5332	2001-10-03
L. chaquensis	10399	FML	Argentina	-23.1	-64.5332	2001-10-03
L. chaquensis	10400	FML	Argentina	-23.1	-64.5332	2001-10-03
L. chaquensis	10401	FML	Argentina	-23.1	-64.5332	2001-10-03
L. chaquensis	10402	FML	Argentina	-23.1	-64.5332	2001-10-03
L. chaquensis	15308	FML	Argentina	-23.1142	-64.2509	2003-11-01
L. chaquensis	15309	FML	Argentina	-23.1142	-64.2509	2003-11-01
L. chaquensis	00086	FML	Argentina	-23.1377	-64.3036	1944-01-01
L. chaquensis	32304	MACN	Argentina	-22.6891	-64.5703	01/11/1981
L. chaquensis	32305	MACN	Argentina	-22.6891	-64.5703	01/11/1981
L. chaquensis	32306	MACN	Argentina	-22.6891	-64.5703	01/11/1981
L. chaquensis	23600	FML	Argentina	-23.3611	-64.3275	2010-02-28
L. chaquensis	01583	FML	Argentina	-22.9397	-64.4295	1970-02-01
L. chaquensis	16007	FML	Argentina	-22.8894	-64.3666	2005-02-07
L. chaquensis	15984	FML	Argentina	-23.0161	-64.3646	2005-02-05
L. chaquensis	15985	FML	Argentina	-23.0161	-64.3646	2005-02-05
L. chaquensis	15986	FML	Argentina	-23.0161	-64.3646	2005-02-05
L. chaquensis	15999	FML	Argentina	-22.9911	-64.3679	2005-02-05
L. chaquensis	16000	FML	Argentina	-22.9911	-64.3679	2005-02-05
L. chaquensis	16001	FML	Argentina	-22.9911	-64.3679	2005-02-05
L. chaquensis	04772	FML	Argentina	-23.2525	-64.2503	1990-12-15
L. chaquensis	34832	MACN	Argentina	-22.654	-64.5224	08/08/1992
L. chaquensis	01610	FML	Argentina	-23.2525	-64.2503	1965-01-22
L. chaquensis	18569	FML	Argentina	-23.2525	-64.2503	2004-02-01
L. chaquensis	00168	FML	Argentina	-22.5226	-63.8091	1945-08-01
L. chaquensis	15765	FML	Argentina	-23.8492	-63.3505	2001-11-07
L. chaquensis	15814	FML	Argentina	-23.8492	-63.3505	2001-11-07
L. chaquensis	15799	FML	Argentina	-23.7694	-63.072	2001-11-05
L. chaquensis	10423	FML	Argentina	-23.8236	-63.4898	2001-10-05
L. chaquensis	10424	FML	Argentina	-23.8236	-63.4898	2001-10-05
L. chaquensis	06966	FML	Argentina	-22.3805	-62.5161	1998-02-28
L. chaquensis	07680	FML	Argentina	-22.3805	-62.5161	1998-10-06
L. chaquensis	45801	MACN	Argentina	-23.4609	-62.8676	7/1/2008
L. chaquensis	23845	FML	Argentina	-23.7604	-63.1268	2001-11-03
L. chaquensis	23846	FML	Argentina	-23.7604	-63.1268	2001-11-03
L. chaquensis	23847	FML	Argentina	-23.7604	-63.1268	2001-11-03
L. chaquensis	23848	FML	Argentina	-23.7604	-63.1268	2001-11-03
L. chaquensis	23849	FML	Argentina	-23.7604	-63.1268	2001-11-03
L. chaquensis	17534	FML	Argentina	-23.9393	-63.1469	2001-11-04
L. chaquensis	17535	FML	Argentina	-23.9393	-63.1469	2001-11-04
L. chaquensis	17536	FML	Argentina	-23.9393	-63.1469	2001-11-04
L. chaquensis	17537	FML	Argentina	-23.9393	-63.1469	2001-11-04
L. chaquensis	17538	FML	Argentina	-23.9393	-63.1469	2001-11-04
L. chaquensis	17539	FML	Argentina	-23.9393	-63.1469	2001-11-04
L. chaquensis	17540	FML	Argentina	-23.9393	-63.1469	2001-11-04
L. chaquensis	15860	MACN	Argentina	-22.2747	-62.7155	01/08/1960
L. chaquensis	15861	MACN	Argentina	-22.2747	-62.7155	01/08/1960
L. chaquensis	15862	MACN	Argentina	-22.2747	-62.7155	01/08/1960
L. chaquensis	34711	MACN	Argentina	-22.6638	-64.5547	18/11/1992
L. chaquensis	31952	MACN	Bolivia	-16.8057	-60.7422	24/10/1977
L. chaquensis	31953	MACN	Bolivia	-16.8057	-60.7422	24/10/1977
L. chaquensis	42061	MACN	Bolivia	-20.1752	-63.8761
L. chaquensis	42062	MACN	Bolivia	-20.1752	-63.8761
L. chaquensis	42063	MACN	Bolivia	-20.1752	-63.8761
L. chaquensis	31957	MACN	Bolivia	-16.8057	-60.7422	24/10/1977
L. chaquensis	31958	MACN	Bolivia	-16.8057	-60.7422	24/10/1977
L. chaquensis	36809	MACN	Argentina	-31.1842	-60.8765	15/10/1966
L. chaquensis	04151	FML	Argentina	-31.134	-60.1284	1973-10-21
L. chaquensis	42279	MACN	Argentina	-31.6755	-60.663	02/02/2010
L. chaquensis	04133	FML	Argentina	-31.4174	-60.326	1973-10-20
L. chaquensis	25624	MACN	Argentina	-32.9006	-60.9078	26/12/1966
L. chaquensis	25625	MACN	Argentina	-32.9006	-60.9078	26/12/1966
L. chaquensis	25626	MACN	Argentina	-32.9006	-60.9078	26/12/1966
L. chaquensis	24188	MACN	Argentina	-30.7459	-60.6209	12/11/1966
L. chaquensis	24189	MACN	Argentina	-30.7459	-60.6209	12/11/1966
L. chaquensis	22979	FML	Argentina	-28.9492	-61.871	1995-01-08
L. chaquensis	22980	FML	Argentina	-28.9492	-61.871	1995-01-08
L. chaquensis	04834	FML	Argentina	-29.231	-61.7722	1991-11-27
[truncated: 8,406 more rows]
